# Supplementary material for: Generation and reactivity of the dehydrotropylium-Co2(CO)6 ion
Source: Royal Society of Chemistry journal article supplement (doi:10.1039/b812174e), 2008-01-01

### Supplementary Information

**Hexacarbonyl[ $\mu$ - $\eta^4$ -(5,7-diacetoxycyclohept-1-en-3-yne)]dicobalt (5):** To a solution of **4** (1.419 g, mmol) in  $\text{CH}_3\text{CO}_2\text{H}$  (20 mL) was added  $\text{H}_2\text{SO}_4$  (10 drops).

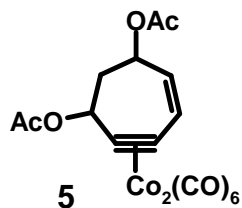

Following stirring for 1.5 h, water was added, and the mixture was subjected to a conventional extractive workup (hexanes). The organic layers were dried over  $\text{MgSO}_4$ , and concentrated under reduced pressure. Flash chromatography (10:1 petroleum ether :  $\text{Et}_2\text{O}$ ) afforded **5** (1.356 g, 96% yield) as a single diastereomer; (**5**), ( $R_f = 0.37$ , 4:1 petroleum ether :  $\text{Et}_2\text{O}$ ); IR (neat, NaCl)  $\nu_{\text{max}}$  3030, 2928, 2095, 2056, 2029, 1741  $\text{cm}^{-1}$ ;  $^1\text{H}$  NMR ( $\text{CDCl}_3$ )  $\delta$  6.77 (d,  $J = 10.0$ , 1H, vinyl-CH), 6.27 (dd,  $J = 10.3$ , 3.7, 1H, CH-OAc), 6.14 (dd,  $J = 10.0$ , 6.3, 1H, vinyl-CH), 5.57 (apparent t,  $J = 6.8$ , 1H, CH-OAc), 2.40 (m, 1H, CHH), 2.16 (s, 3H, C(O)-CH<sub>3</sub>), 2.05 (m, 1H, CHH), 2.03 (s, 3H, C(O)-CH<sub>3</sub>);  $^{13}\text{C}$  NMR ( $\text{CDCl}_3$ ) 198.9 (br), 170.2, 170.0, 130.6, 130.3, 93.9, 81.4, 71.0, 67.3, 35.0, 21.0, 20.8; MS (EI, 20 eV)  $m/e$  466 ( $\text{M} - \text{CO}^+$ ), 438 ( $\text{M}^+ - 2\text{CO}$ ), 354 ( $\text{M}^+ - 5\text{CO}$ ), 326 ( $\text{M}^+ - 6\text{CO}$ ); HRMS (TOF)  $m/e$  for  $\text{C}_{17}\text{H}_{12}\text{Co}_2\text{O}_{10}$  calcd. 465.9145 ( $\text{M} - \text{CO}^+$ ), found 465.9159.

**Hexacarbonyl[ $\mu$ - $\eta^4$ -(6-hydroxycyclohept-2-en-4-ynone)]dicobalt (7):** Compound **5** (0.3572 g, 0.723 mmol) was dissolved in  $\text{Et}_2\text{O}$  and cooled to  $-78^\circ\text{C}$ . DIBAL-H (3.0 mL

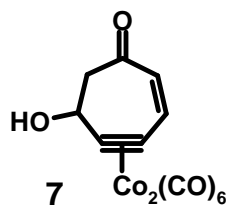

of a 1 M solution in  $\text{Et}_2\text{O}$ , 4 equiv) was added and the solution stirred for 1.5 h. Saturated  $\text{NH}_4\text{Cl}_{(\text{aq})}$  was added and the reaction mixture was subjected to a conventional extractive workup ( $\text{Et}_2\text{O}$ ). Removal of the volatiles under reduced pressure afforded crude **6**, which was dissolved in  $\text{CH}_2\text{Cl}_2$ . Addition of  $\text{MnO}_2$  (excess), and the mixture stirred 12 h. Filtration through silica gel and concentration under reduced pressure gave a residue, which was subjected to flash chromatography (4:1 petroleum ether :  $\text{Et}_2\text{O}$ ) to afford **7** (0.1829 g, 62%); (**7**), ( $R_f = 0.30$ , 2:1 petroleum ether :  $\text{Et}_2\text{O}$ ); IR (neat, NaCl)  $\nu_{\text{max}}$  3417, 3027, 2925, 2099, 2059, 2030, 1651  $\text{cm}^{-1}$ ;  $^1\text{H}$  NMR ( $\text{CDCl}_3$ )  $\delta$  7.36 (d,  $J = 10.4$ , 1H, vinyl-CH), 6.26 (d,  $J = 10.4$ , 1H, vinyl-CH), 5.17 (m, 1H, CH-OH), 3.02 (m, 2H, CH<sub>2</sub>), 2.20 (d,  $J = 5.0$ , 1H, OH);  $^{13}\text{C}$  NMR ( $\text{CDCl}_3$ ) 198.3 (br, obscured), 198.3, 139.5, 132.2, 97.8, 78.4, 68.7, 52.3; MS (EI, 20 eV)  $m/e$  408 ( $\text{M}^+$ ), 380 ( $\text{M} - \text{CO}^+$ ), 352 ( $\text{M} - 2\text{CO}^+$ ), 324 ( $\text{M} - 3\text{CO}^+$ ), 296 ( $\text{M} - 4\text{CO}^+$ ); HRMS (TOF)  $m/e$  for  $\text{C}_{13}\text{H}_6\text{Co}_2\text{O}_8$  calcd. ( $\text{M}^+$ ) 407.8727, found 407.8705.

**Hexacarbonyl[ $\mu$ - $\eta^4$ -(cyclohepta-2,6-dien-4-ynone)]dicobalt (8):** To a solution of **7** (0.200 g,

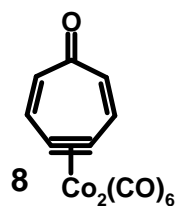

0.490 mmol) in  $\text{CH}_2\text{Cl}_2$  (10 mL) was added  $\text{HBF}_4$  (0.5 mL, 54 wt. % in  $\text{Et}_2\text{O}$ , excess) in a dropwise fashion. After 20 min  $\text{NaHCO}_3(\text{sat})$  was added, and followed by a conventional extractive workup ( $\text{CH}_2\text{Cl}_2$ ). Flash chromatographic purification (5:1 petroleum ether: $\text{Et}_2\text{O}$ ) afforded **8** (0.095 g, 50% yield); **(8)**, ( $R_f = 0.45$ , 4:1 petroleum ether :  $\text{Et}_2\text{O}$ ); (neat, NaCl)  $v_{\text{max}}$  3031, 2927, 2102, 2064,

2032, 1699  $\text{cm}^{-1}$ ;  $^1\text{H NMR}$  ( $\text{CDCl}_3$ )  $\delta$  7.61 (d,  $J = 10.0$ , 2H, vinyl-CH), 6.59 (d,  $J = 10.0$ , 2H, vinyl-CH);  $^{13}\text{C NMR}$  ( $\text{CDCl}_3$ ) 198.0 (br), 191.1, 140.5, 135.3, 80.5; MS (EI, 20 eV)  $m/e$  390 ( $\text{M}^+$ ), 362( $\text{M-CO}^+$ ), 334( $\text{M-2CO}^+$ ), 306( $\text{M-3CO}^+$ ), 278( $\text{M-4CO}^+$ ), 250( $\text{M-5CO}^+$ ), 222( $\text{M-6CO}^+$ ); HRMS (TOF)  $m/e$  for  $\text{C}_{13}\text{H}_4\text{Co}_2\text{O}_7$  calcd. ( $\text{M}^+$ ) 389.8621, found 389.8625.

**Hexacarbonyl[ $\mu$ - $\eta^4$ -(cyclohepta-2,6-dien-4-ynol)]dicobalt (3) and Hexacarbonyl[ $\mu$ - $\eta^4$ -(cyclohepta-2,4-dien-6-ynol)]dicobalt (9):** To a solution of **8** (0.0768 g, 0.197 mmol) in  $\text{Et}_2\text{O}$

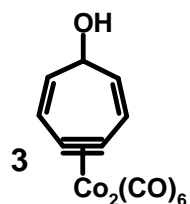

(10 mL) at  $-78^\circ\text{C}$  was added DIBAL-H (0.5 mL of 1M solution, 0.5 mmol). After stirred 2 h at  $-78^\circ\text{C}$ , saturated  $\text{NH}_4\text{Cl}(\text{aq})$  was added, and the reaction subjected to a conventional extractive workup ( $\text{Et}_2\text{O}$ ). Flash chromatographic purification (100% petroleum ether – 5:1 petroleum ether:  $\text{Et}_2\text{O}$ ) gave the sequential elution of recovered **8** (0.0036g, 5% recovery), alcohol **9** (0.0038 g, 5% yield), and **3** (0.0633 g, 82% yield, 86% based on recovered **8**); **(3)**, ( $R_f = 0.20$ , 5:1 petroleum ether :  $\text{Et}_2\text{O}$ ); IR (neat, NaCl)  $v_{\text{max}}$  3324, 3021, 2923, 2099,

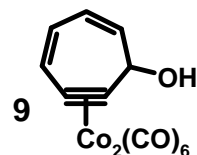

2053, 2053, 2028, 2009  $\text{cm}^{-1}$ ;  $^1\text{H NMR}$  ( $\text{CDCl}_3$ )  $\delta$  6.79 (dd,  $J = 10.0$ , 1.8, 1H, vinyl-CH), 5.93 (dd,  $J = 10.0$ , 3.8, 1H, vinyl-CH), 4.94 (br, 1H, CH-OH), 2.21 (br, 1H, OH);  $^{13}\text{C NMR}$  ( $\text{CDCl}_3$ ) 199.1, 133.0, 127.5, 84.8, 70.3; MS (EI, 20 eV)  $m/e$  392 ( $\text{M}^+$ ); HRMS  $m/e$  for  $\text{C}_{13}\text{H}_6\text{Co}_2\text{O}_7$  calcd. 391.8763 ( $\text{M}^+$ ), found 391.8764. Compound **(9)**, ( $R_f = 0.32$ , 5:1 petroleum ether :  $\text{Et}_2\text{O}$ ) IR (neat, NaCl)  $v_{\text{max}}$  3400 (br), 3022, 2095, 2054, 2022  $\text{cm}^{-1}$ ;  $^1\text{H NMR}$  ( $\text{CDCl}_3$ )  $\delta$

6.88 (d,  $J = 9.8$ , 1H, vinyl-CH), 6.17 (m, 1H, vinyl-CH), 5.92-5.98 (m, 2H, 2 vinyl-CH), 5.55 (d,  $J = 6.2$ , 1H, CH-OH), 2.18 (br, 1H, OH);  $^{13}\text{C NMR}$  ( $\text{CD}_2\text{Cl}_2$ ) 199.8 (br), 135.7, 131.4, 127.2, 126.4, 102.5, 83.1, 72.5; MS (EI, 20 eV)  $m/e$  364 ( $\text{M-CO}^+$ ), 336 ( $\text{M-2CO}^+$ ), 308 ( $\text{M-3CO}^+$ ), 280 ( $\text{M-4CO}^+$ ), 252 ( $\text{M-5CO}^+$ ), 224 ( $\text{M-6CO}^+$ ),.

**Hexacarbonyl[ $\mu$ - $\eta^4$ -(7-(2,4,6-trimethoxyphenyl)cyclohepta-1,3-dien-5-yne)]dicobalt (**10a $\alpha$** ):**

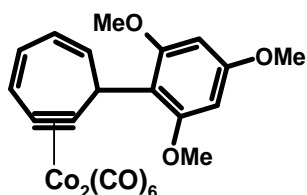

**10a $\alpha$**

To a solution of compound **3** (0.023 g, 0.059 mmol) and 1,3,5-trimethoxybenzene (0.050 g, 0.29 mmol) in CH<sub>2</sub>Cl<sub>2</sub> (5 mL) at 0 °C was added BF<sub>3</sub>-OEt<sub>2</sub> (21  $\mu$ L, 0.18 mmol). After 15 min, saturated NaHCO<sub>3(aq)</sub> was added and the mixture subjected to a conventional extractive workup (CH<sub>2</sub>Cl<sub>2</sub>). The combined organic layer were dried

over MgSO<sub>4</sub> and concentrated under reduced pressure. Flash chromatography (10:1 petroleum ether : Et<sub>2</sub>O) afforded **10a $\alpha$**  (0.028 g, 88% yield); (**10a $\alpha$** ), ( $R_f$  = 0.38, 10:1 petroleum ether : Et<sub>2</sub>O); IR (neat, NaCl)  $\nu_{max}$  3019, 2924, 2090, 2050, 2020 cm<sup>-1</sup>; <sup>1</sup>H NMR (CDCl<sub>3</sub>)  $\delta$  6.74 (d, J = 9.6, 1H, vinyl-CH), 6.17 (s, 2H, aryl-CH), 6.12 (dd, J = 9.6, 7.5, 1H, vinyl-CH), 5.95 (dd, J = 11.9, 1.9, 1H, vinyl-CH), 5.83 (m, 1H, vinyl-CH), 5.59 (br s, 1H, alkyl-CH), 3.86 (s, 3H, OCH<sub>3</sub>), 3.80 (s, 3H, OCH<sub>3</sub>), 3.78 (s, 3H, OCH<sub>3</sub>); <sup>13</sup>C NMR (CDCl<sub>3</sub>) 199.8 (br), 160.3, 159.7, 158.2, 137.7, 129.3, 127.4, 124.7, 110.8, 106.4, 90.7, 90.1, 85.6, 55.3, 55.2, 54.5, 40.0; MS (EI, 20 eV) m/e 514 (M-CO<sup>+</sup>), 486 (M-2CO<sup>+</sup>), 458 (M-3CO<sup>+</sup>), 430 (M-4CO<sup>+</sup>), 402 (M-5CO<sup>+</sup>), 374 (M-6CO<sup>+</sup>); HRMS (TOF) m/e for C<sub>22</sub>H<sub>16</sub>Co<sub>2</sub>O<sub>9</sub> calcd. (M-2CO<sup>+</sup>) 485.9560, found 485.9538.

**Hexacarbonyl[ $\mu$ - $\eta^4$ -(7-(2-methylallyl)cyclohepta-1,3-dien-5-yne)]dicobalt (**10b $\alpha$** ) and Hexacarbonyl[ $\mu$ - $\eta^4$ -(7-(2-methylallyl)cyclohepta-1,5-dien-3-yne)]dicobalt (**10b $\gamma$** ):**

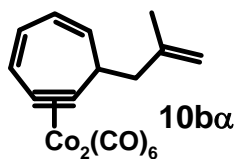

**10b $\alpha$**

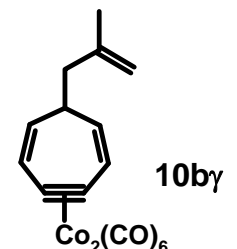

**10b $\gamma$**

of **3** (0.020 g, 0.051 mmol) with methylallyltrimethylsilane (35  $\mu$ L, 0.20 mmol) under the standard conditions afforded **10b** (0.016 g, 73%) as a 67:33 mixture of **10b $\alpha$** :**10b $\gamma$**  following purification by flash chromatography (100% hexanes); (**10b**), ( $R_f$  = 0.69, 100% petroleum

ether); IR (neat, NaCl)  $\nu_{max}$  2091, 2050, 2021 cm<sup>-1</sup>; <sup>1</sup>H NMR (CDCl<sub>3</sub>)  $\delta$  (major isomer) 6.79 (d, J = 9.6, 1H, vinyl-CH), 6.12 (dd, J = 9.6, 7.2, 1H, vinyl-CH), 5.90 (ddd, J = 11.9, 7.2, 2.4, 1H, vinyl-CH), 5.73 (ddd, J = 11.9, 3.0, 0.9, 1H, vinyl-CH), 4.93 (s, 1H, =CHH), 4.87 (s, 1H, =CHH), 3.83 (m, 1H, alkyl-CH), 2.59 (dd, J = 14.1, 5.1, 1H, CHH), 2.44 (dd, J = 14.1, 10.2,

1H, CHH), 1.80 (s, 3H, CH<sub>3</sub>); (minor isomer) 6.71 (br d, J = 9.7, 2.2, 2H, vinyl-CH), 5.65 (dd, J = 9.7, 4.2, 2H, vinyl-CH), 4.87 (s, 1H, =CHH), 4.76 (s, 1H, =CHH), 3.15 (m, 1H, alkyl-CH), 2.33 (d, 7.7, 2H, CH<sub>2</sub>), 1.70 (s, 3H, CH<sub>3</sub>); <sup>13</sup>C NMR (CDCl<sub>3</sub>) (major isomer) 199.7 (br), 142.6, 134.0, 127.61, 127.2, 113.2, 105.7, 85.8, 45.5, 41.1, 22.2; resonances from the minor isomer could be detected at 142.2, 135.0, 127.58, 113.4, 87.3, 44.8, 39.8, 22.0; MS (EI, 20 eV) m/e 402

(M-CO<sup>+</sup>), 374 (M-2CO<sup>+</sup>), 346 (M-3CO<sup>+</sup>), 318 (M-4CO<sup>+</sup>), 290 (M-5CO<sup>+</sup>), 262 (M-6CO<sup>+</sup>); HRMS (TOF) m/e for C<sub>17</sub>H<sub>12</sub>Co<sub>2</sub>O<sub>6</sub> calcd. (M-CO<sup>+</sup>) 401.9349, found 401.9334.

**Hexacarbonyl[μ-η<sup>4</sup>-(7-allylcyclohepta-1,3-dien-5-yne)]dicobalt (10cα) and Hexacarbonyl[μ-η<sup>4</sup>-(7-allylcyclohepta-1,5-dien-3-yne)]dicobalt (10cγ):** Reaction of **3** (0.028 g, 0.071 mmol)

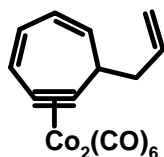

**10cα**

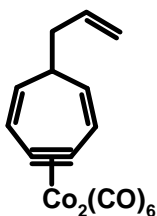

**10cγ**

with allyltrimethylsilane (56 μL, 0.36 mmol) under the standard conditions afforded **10c** (0.021 g, 70%) as a 83:17 mixture of **10cα**:**10cγ** following purification by flash chromatography (100% hexanes); (**10c**), (R<sub>f</sub> = 0.65, 100% petroleum ether); (neat, NaCl) ν<sub>max</sub> cm<sup>-1</sup>; <sup>1</sup>H NMR (CDCl<sub>3</sub>) (major isomer) δ 6.79 (d, J = 10.0, 1H, vinyl-CH), 6.11 (dd, J = 10.0, 7.5, 1H, vinyl-CH), 5.96 (m, 1H, vinyl-CH), 5.90 (m, 1H, vinyl-CH), 5.74 (ddd, J = 12.0, 3.0, 1.0, 1H), 5.22 (dd, J = 17.0, 1.5, 1H, =CHH), 5.17 (dd, J = 10.5, 1.5, 1H, CHH), 3.74 (m, 1H, alkyl-CH), 2.67 (m, 1H, CHH), 2.51 (m, 1H, CHH); (minor isomer) δ 6.69 (dd, J = 9.5, 2.0, 2H, 2 vinyl-CH), 5.79 (m, 1H, vinyl-CH), 5.64 (dd, J = 9.5, 4.3, 2H, 2 vinyl-CH), 5.10 (d, J = 9.4, 1H, vinyl-CH), 5.09 (d, J = 17.7, 1H, vinyl-CH), 3.16 (m, 1H, alkyl-CH), 2.37 (apparent t, J = 6.8, 2H, CH<sub>2</sub>); <sup>13</sup>C NMR (CDCl<sub>3</sub>)

(major isomer) 199.6 (br), 136.0, 135.0, 130.2, 127.7, 127.1, 117.4, 104.9, 85.8, 43.5, 41.3; resonances from the minor isomer could be detected at 135.5, 133.8, 127.4, 42.5, 41.1; MS (EI, 20 eV) m/e 418 (M<sup>+</sup>), 388 (M-CO<sup>+</sup>), 360 (M-2CO<sup>+</sup>), 332 (M-3CO<sup>+</sup>), 304 (M-4CO<sup>+</sup>), 276 (M-5CO<sup>+</sup>), 248 (M-6CO<sup>+</sup>); HRMS (TOF) m/e for C<sub>16</sub>H<sub>10</sub>Co<sub>2</sub>O<sub>6</sub> calcd. (M-CO<sup>+</sup>) 387.9192, found 387.9166.

**Hexacarbonyl[μ-η<sup>4</sup>-(7-(cyclohexenylmethyl)cyclohepta-1,3-dien-5-yne)]dicobalt (10dα) and Hexacarbonyl[μ-η<sup>4</sup>-(7-(cyclohexenylmethyl)cyclohepta-1,5-dien-3-yne)]dicobalt (10dγ):**

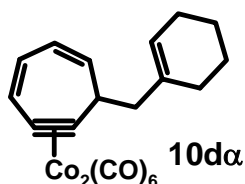

**10dα**

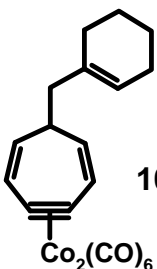

**10dγ**

Reaction of **3** (0.027 g, 0.068 mmol) with methylenecyclohexane (33 μL, 0.28 mmol) under the standard conditions afforded **10d** (0.016 g, 50%) as a 90:10 mixture of **10dα**:**10dγ** following purification by flash chromatography (10:1 petroleum ether : Et<sub>2</sub>O); (**10d**), (R<sub>f</sub> = 0.75, 100% petroleum ether); (neat, NaCl) ν<sub>max</sub> 3018, 2929, 2090, 2050, 2020 cm<sup>-1</sup>; <sup>1</sup>H NMR (CDCl<sub>3</sub>) (major isomer) δ 6.77 (d, J = 9.5, 1H, vinyl-CH), 6.11 (dd, J = 9.5, 7.0, 1H, vinyl-CH), 5.88 (m, 1H, vinyl-CH), 5.73 (dd, J = 12.0, 1.0, 1H, vinyl-CH), 5.58 (br s, 1H, vinyl-CH), 3.82 (m, 1H, alkyl-CH), 2.53 (m,

1H, **CHH**), 2.34 (m, 1H, **CHH**), 2.00-2.10 (m, 4H, **2 CH<sub>2</sub>**), 1.55-1.75 (m, 4H, **2 CH<sub>2</sub>**); resonances from the minor isomer could be detected at 6.49 (dd, J = 9.5, 2.2, 1H, **2 vinyl-CH**), 5.64 (dd, J = 9.5, 4.5, 1H, **2 vinyl-CH**), 5.49 (br s, 1H, **vinyl-CH**), 3.16 (m, 1H, **alkyl-CH**), 2.24 (d, J = 7.5, 2H, **CH<sub>2</sub>**); <sup>13</sup>C NMR (**CDCl<sub>3</sub>**) (major isomer) 199.7 (br), 135.4, 134.8, 130.0, 127.3, 127.2, 124.2, 106.1, 85.9, 46.0, 41.0, 28.2, 25.3, 22.9, 22.4; peaks from the minor isomer could be observed at 134.4, 124.5, 45.3, 40.0, 20.0; MS (**EI, 20 eV**) m/e 470 (M<sup>+</sup>), 442 (M - CO<sup>+</sup>), 414 (M - 2CO<sup>+</sup>), 386 (M - 3CO<sup>+</sup>), 358 (M - 4CO<sup>+</sup>), 330 (M - 5CO<sup>+</sup>), 302 (M - 6CO<sup>+</sup>); HRMS (**TOF**) m/e for C<sub>20</sub>H<sub>16</sub>Co<sub>2</sub>O<sub>6</sub> calcd. (M<sup>+</sup>) 469.9611, found 469.9626.

**Hexacarbonyl[μ-η<sup>4</sup>-(7-(5-methyl-2-thienyl)cyclohepta-1,3-dien-5-yne)]dicobalt (10ea):**

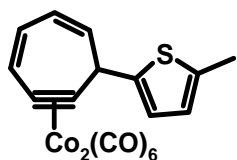

**10ea**

Reaction of **3** (0.018 g, 0.046 mmol) with 2-methylthiophene (23 μL, 0.23 mmol) under the standard conditions afforded **10ea** (0.018 g, 83% yield) following purification by flash chromatography (100% hexanes); (**10ea**), (**R<sub>f</sub>** = 0.59, 100% petroleum ether); (neat, NaCl)  $\nu_{\max}$  3020, 2923, 2091, 2052, 2022 cm<sup>-1</sup>; <sup>1</sup>H NMR (**CDCl<sub>3</sub>**)  $\delta$  6.84 (d, J = 9.0, 1H, **vinyl-CH**), 6.76 (d, J = 3.0, 1H, **thienyl-CH**), 6.61 (d, J = 3.0, 1H, **thienyl-CH**), 6.18 (m, 1H, **vinyl-CH**), 6.00-6.08 (m, 2H, **2 vinyl-CH**), 5.16 (s, 1H, **alkyl-CH**), 2.46 (s, **3H, CH<sub>3</sub>**); <sup>13</sup>C NMR (**CDCl<sub>3</sub>**) 199.0 (br), 145.0, 139.0, 134.3, 131.0, 127.9, 126.6, 124.7, 124.4, 105.9, 84.5, 45.7, 15.4; MS (**EI, 20 eV**) m/e 472 (M<sup>+</sup>), 444 (M - CO<sup>+</sup>), 416 (M - 2CO<sup>+</sup>), 388 (M - 3CO<sup>+</sup>), 360 (M - 4CO<sup>+</sup>), 332 (M - 5CO<sup>+</sup>), 304 (M - 6CO<sup>+</sup>); HRMS (**TOF**) m/e for C<sub>18</sub>H<sub>10</sub>Co<sub>2</sub>O<sub>6</sub>S calcd. (M<sup>+</sup>) 471.8862, found 471.8851.

**Hexacarbonyl[μ<sup>4</sup>-η<sup>2</sup>,η<sup>2</sup>,η<sup>2</sup>,η<sup>2</sup>-(1,1'-bi(cyclohepta-2,4-dien-6-yne)]tetracobalt (11αα) and Hexacarbonyl[μ<sup>4</sup>-η<sup>2</sup>,η<sup>2</sup>,η<sup>2</sup>,η<sup>2</sup>-(7-(cyclohepta-2,6-dien-4-ynyl)cyclohepta-1,3-dien-5-yne)]-**

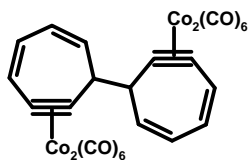

**11αα**

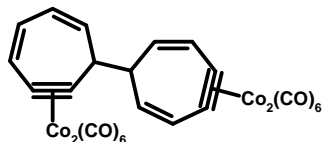

**11αγ**

**tetracobalt (11αγ):** To a solution of **3** (0.028 g, 0.071 mmol) and mesitylene (49 μL, 0.36 mmol) in CH<sub>2</sub>Cl<sub>2</sub> (5 mL) at 0 °C was added BF<sub>3</sub>-OEt<sub>2</sub> (26 μL, 0.21 mmol). After 15 min, saturated NaHCO<sub>3(aq)</sub> was added and the mixture subjected to a conventional extractive workup (CH<sub>2</sub>Cl<sub>2</sub>). The combined organic layer were dried over MgSO<sub>4</sub> and concentrated under reduced pressure. Flash chromatography (100% hexanes) afforded **11** (0.0133 g, 50%) as a 33:67 mixture of **11αα**:**11αγ**. Compound **11αγ** slowly decomposed in

solution in CDCl<sub>3</sub>; (**11**), (R<sub>f</sub> = 0.52, 100% petroleum ether); IR (neat, NaCl)  $\nu_{\max}$  3020, 2923, 2091, 2053, 2023 cm<sup>-1</sup>; <sup>1</sup>H NMR (CDCl<sub>3</sub>) (major isomer)  $\delta$  6.96 (dd, J = 9.8, 2.6, 1H, vinyl-CH), 6.94 (dd, J = 9.3, 2.6, 1H, vinyl-CH), 6.87 (d, J = 9.6, 1H, vinyl-CH), 6.17 (dd, J = 9.6, 7.3, 1H, vinyl-CH). 6.0-6.08 (m, 2H, 2 vinyl-CH), 5.96 (dd, J = 9.3, 3.6, 1H, vinyl-CH), 5.77 (ddd, J = 11.9, 3.1, 1.0, 1H, vinyl-CH), 3.96 (m, 1H, alkyl-CH), 3.38 (m, 1H, alkyl-CH); resonances from the minor isomer could be detected at 6.89 (d, J = 9.7, 2H, vinyl-CH), 6.25 (dd, J = 9.7, 7.3, 2H, vinyl-CH), 6.13 (m, 2H, vinyl-CH), 6.00 (ddd, J = 12.0, 2.5, 1.0, 2H, vinyl-CH), 4.16 (br s, 2H, alkyl-CH); <sup>13</sup>C NMR (CDCl<sub>3</sub>) 199.3 (br), 133.4 (major), 132.8 (major), 132.3 (major), 131.6 (minor), 130.8 (major), 130.5 (major), 130.2 (minor), 129.8 (minor), 129.6 (major), 127.7 (minor), 126.9 (major), 104.2, 86.4, 48.5 (minor), 46.7 (major); MS (EI, 20 eV) m/e 638 (M<sup>+</sup>-4CO), 610 (M<sup>+</sup>-5CO), 582 (M<sup>+</sup>-6CO), 554 (M<sup>+</sup>-7CO), 526 (M<sup>+</sup>-8CO), 498 (M<sup>+</sup>-9CO), 470 (M<sup>+</sup>-10CO), 442 (M<sup>+</sup>-11CO), 414 (M<sup>+</sup>-12CO); HRMS (TOF) m/e for C<sub>26</sub>H<sub>10</sub>Co<sub>4</sub>O<sub>12</sub> calcd. (M<sup>+</sup>) 749.7500, found 749.7515.

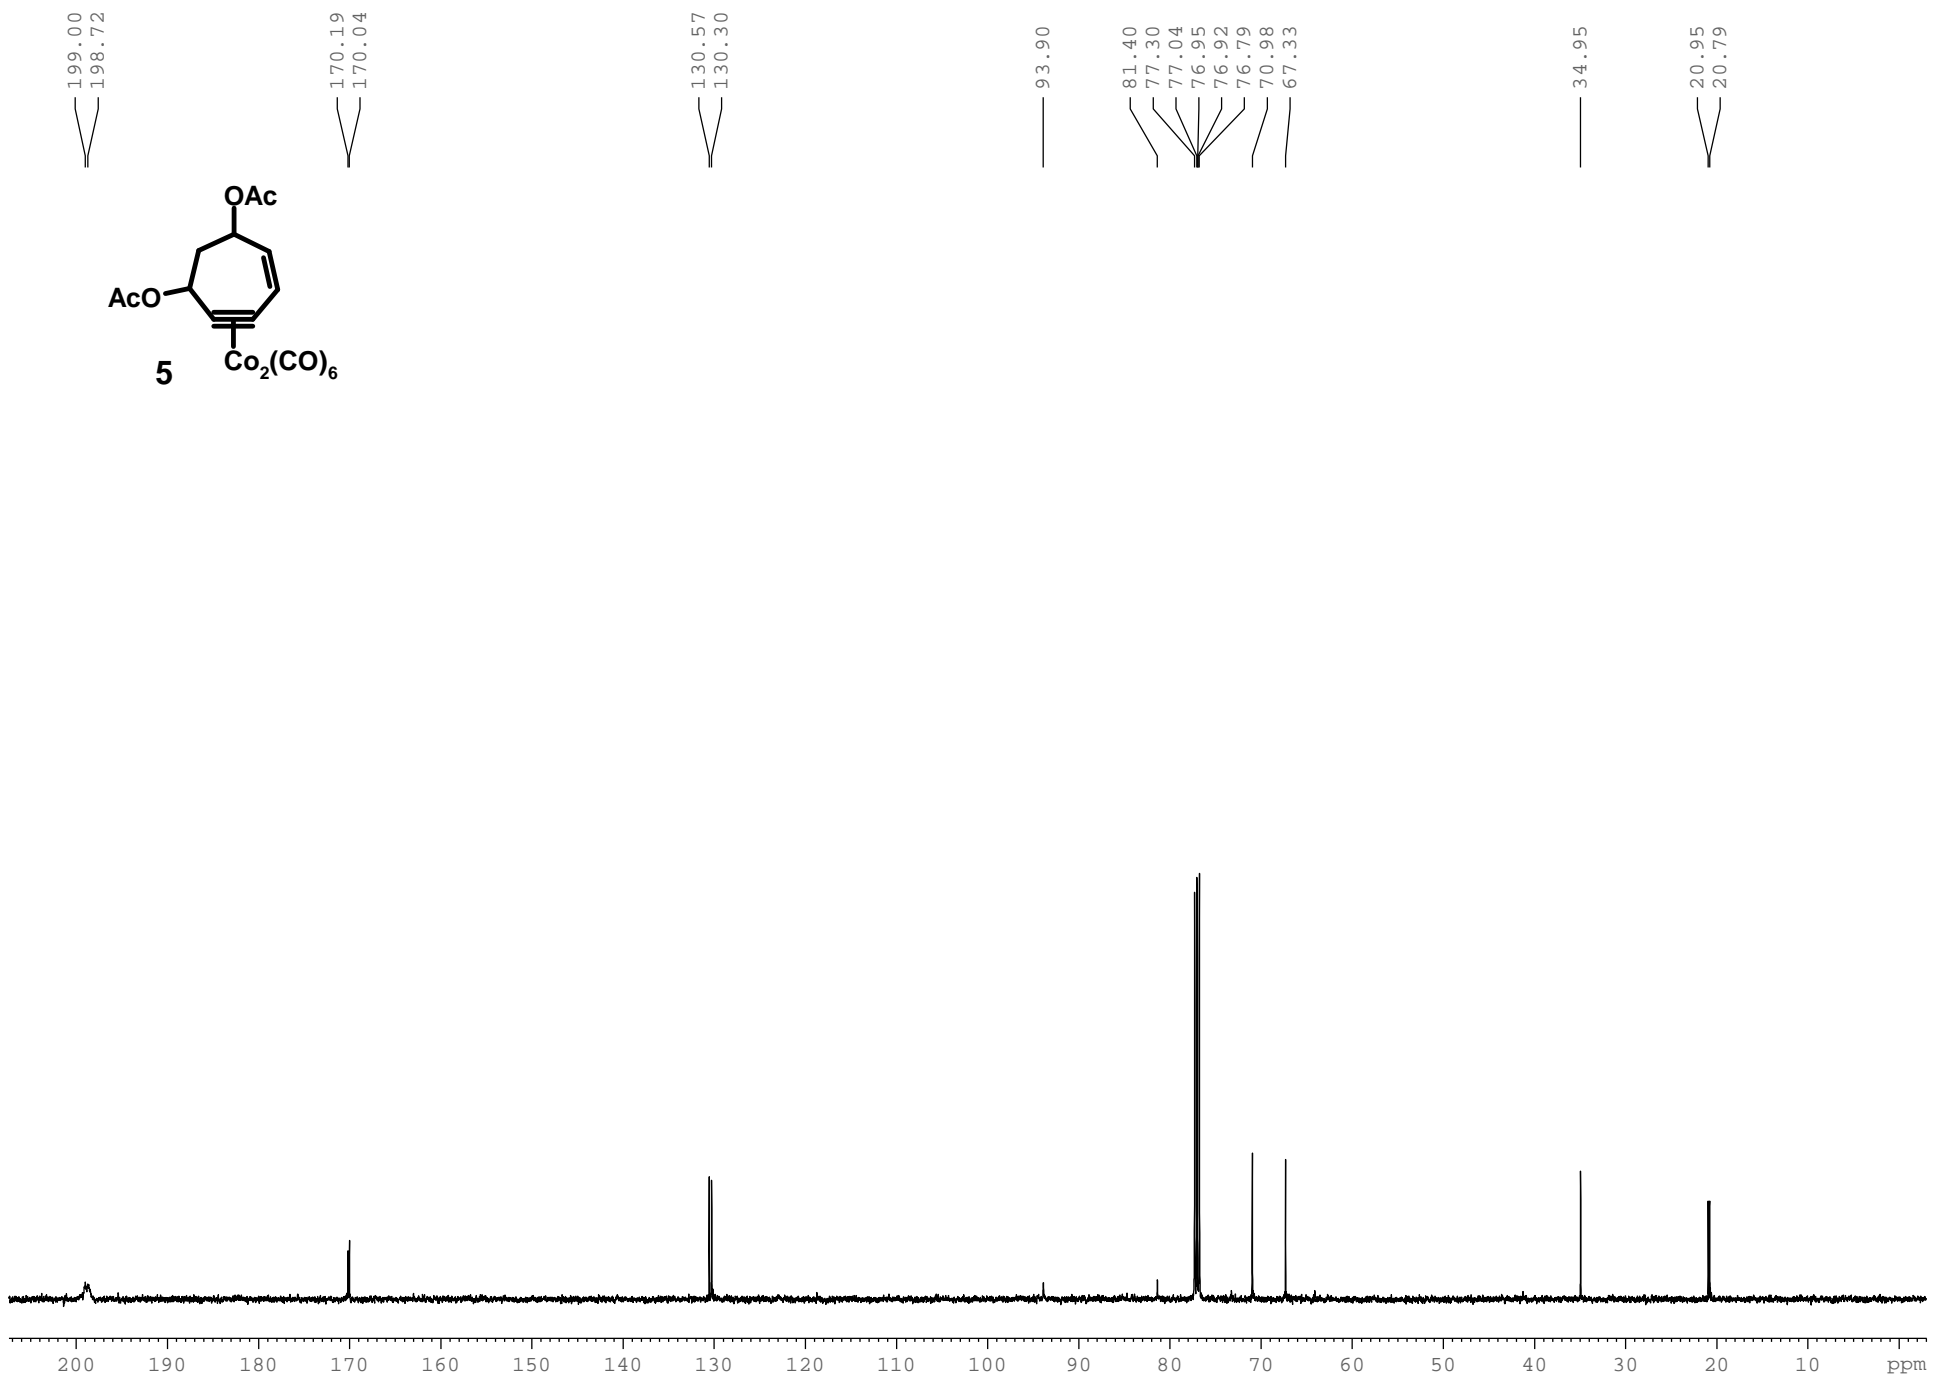

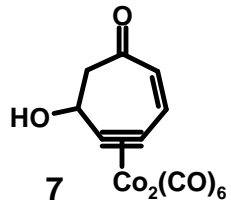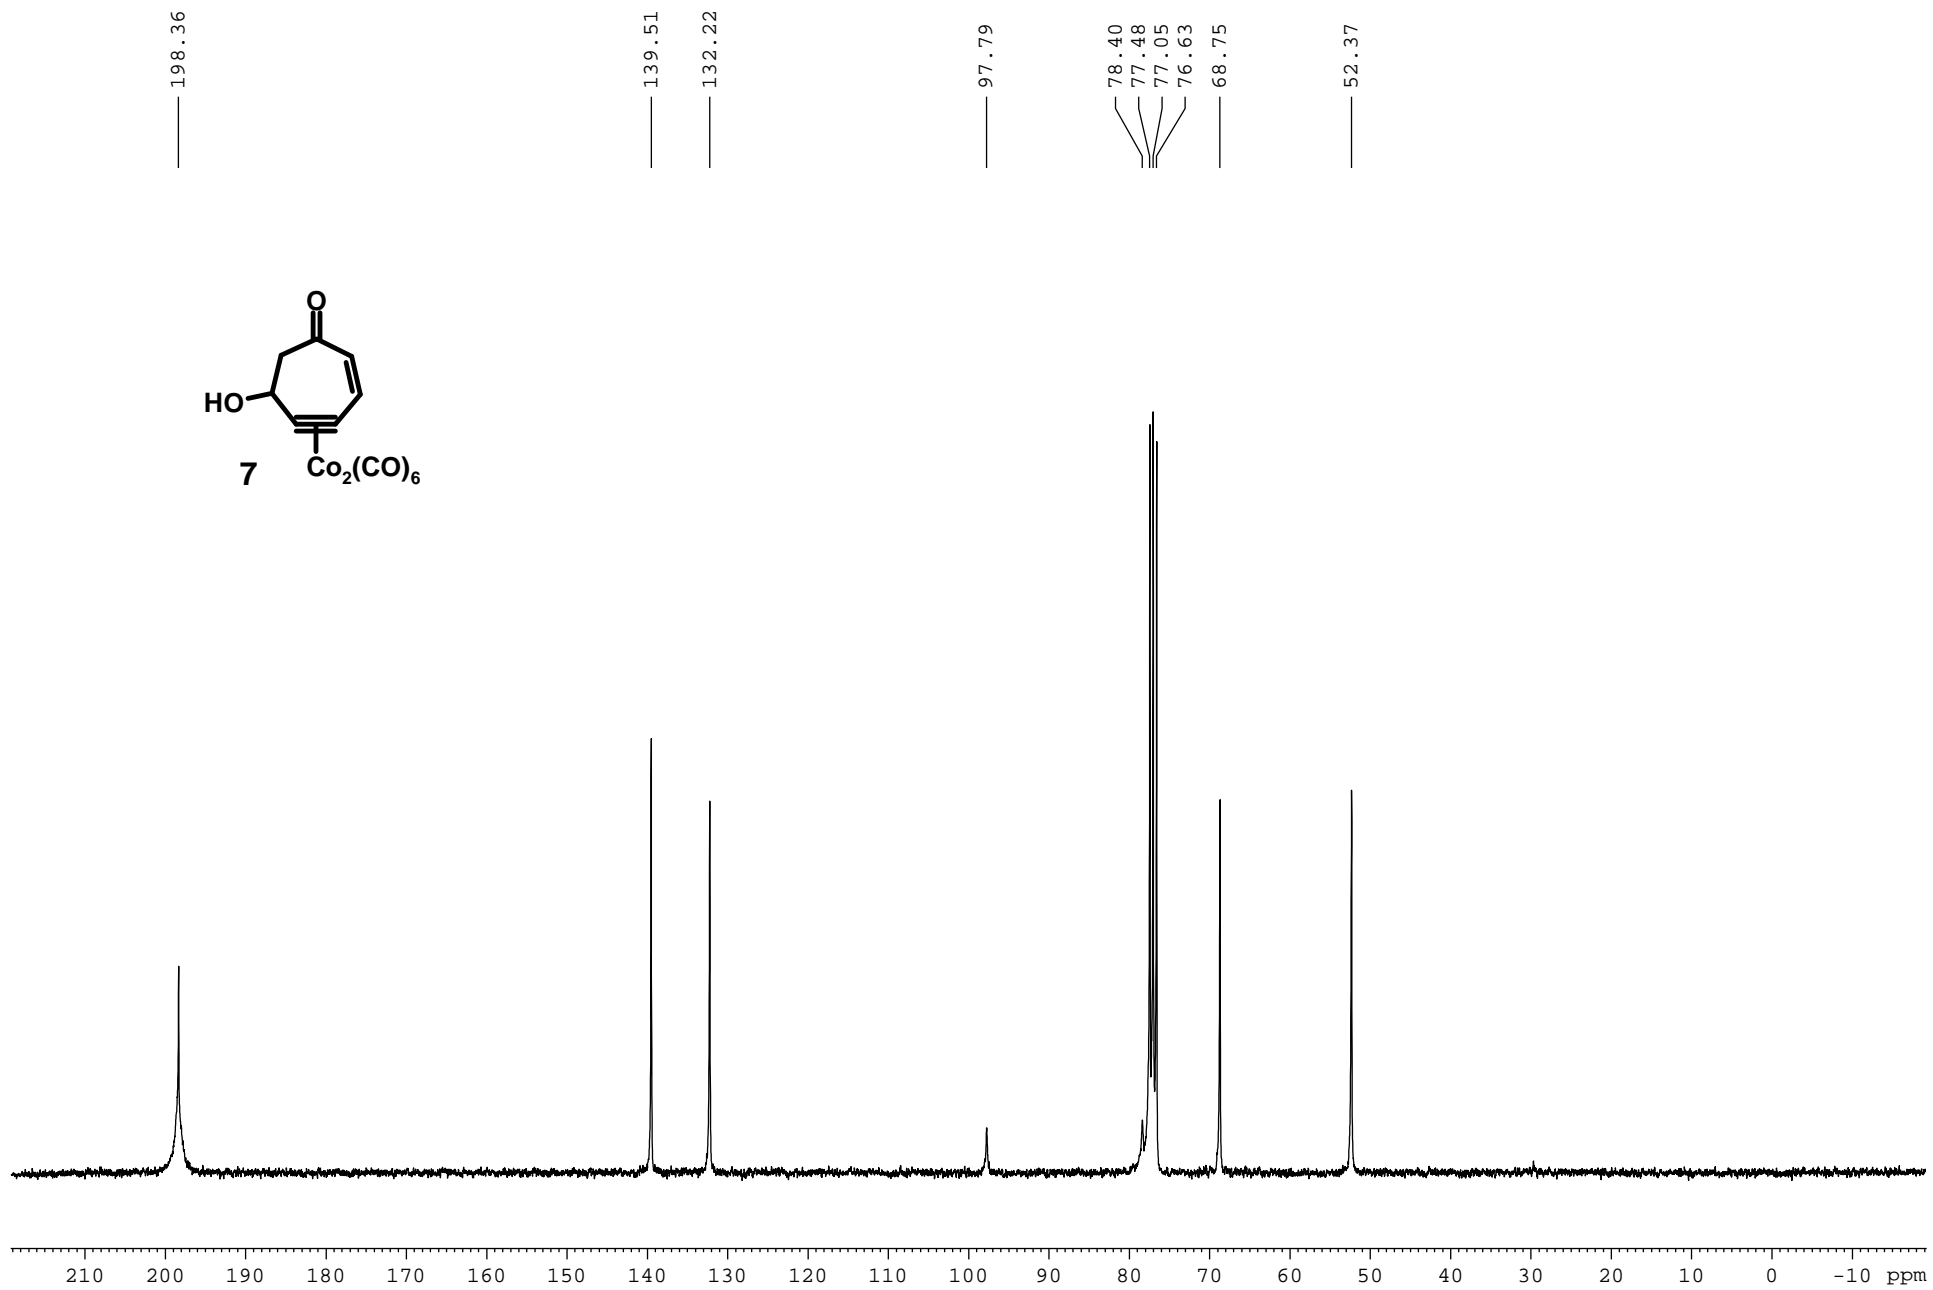



197.98

191.14

140.45

135.31

80.50

77.53

77.30

77.10

76.68

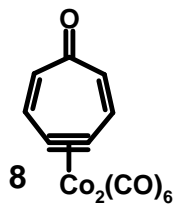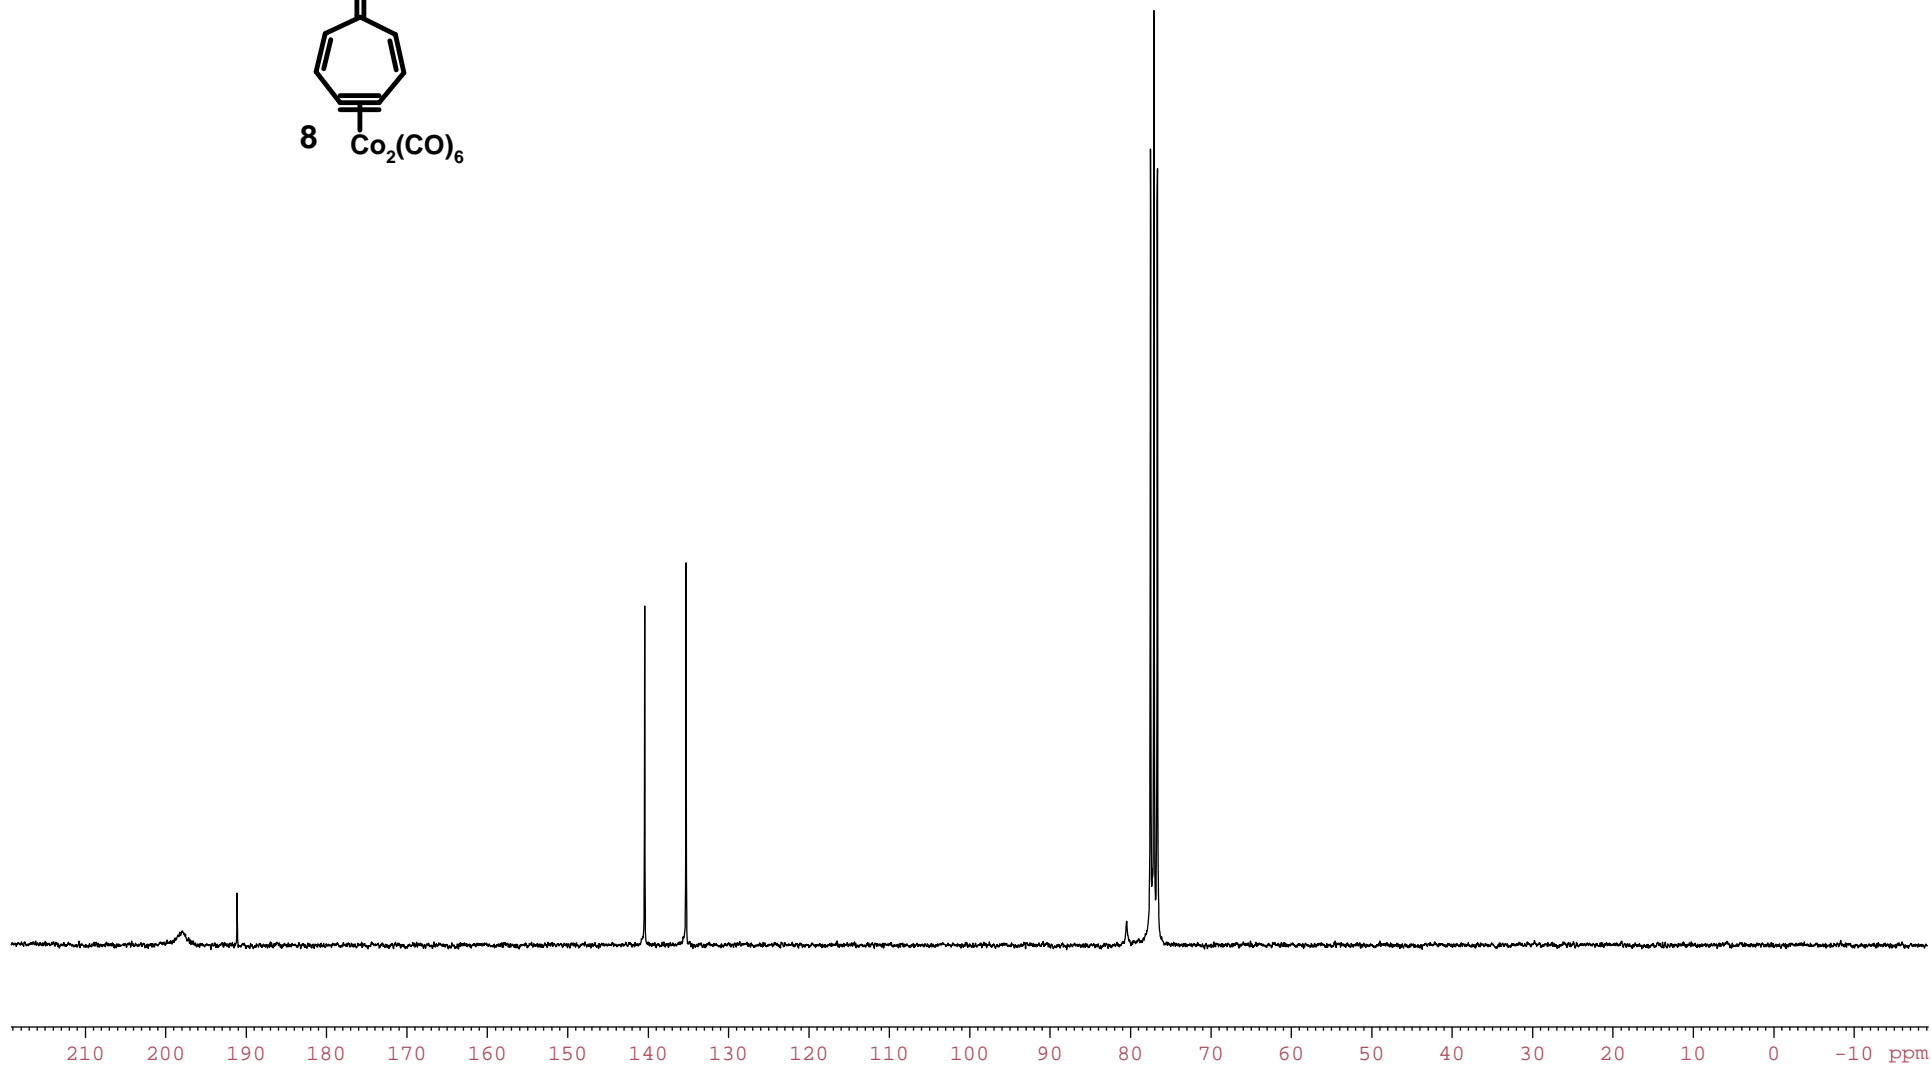

199.16

133.06

127.56

84.87

77.30

77.04

76.79

70.29

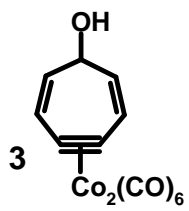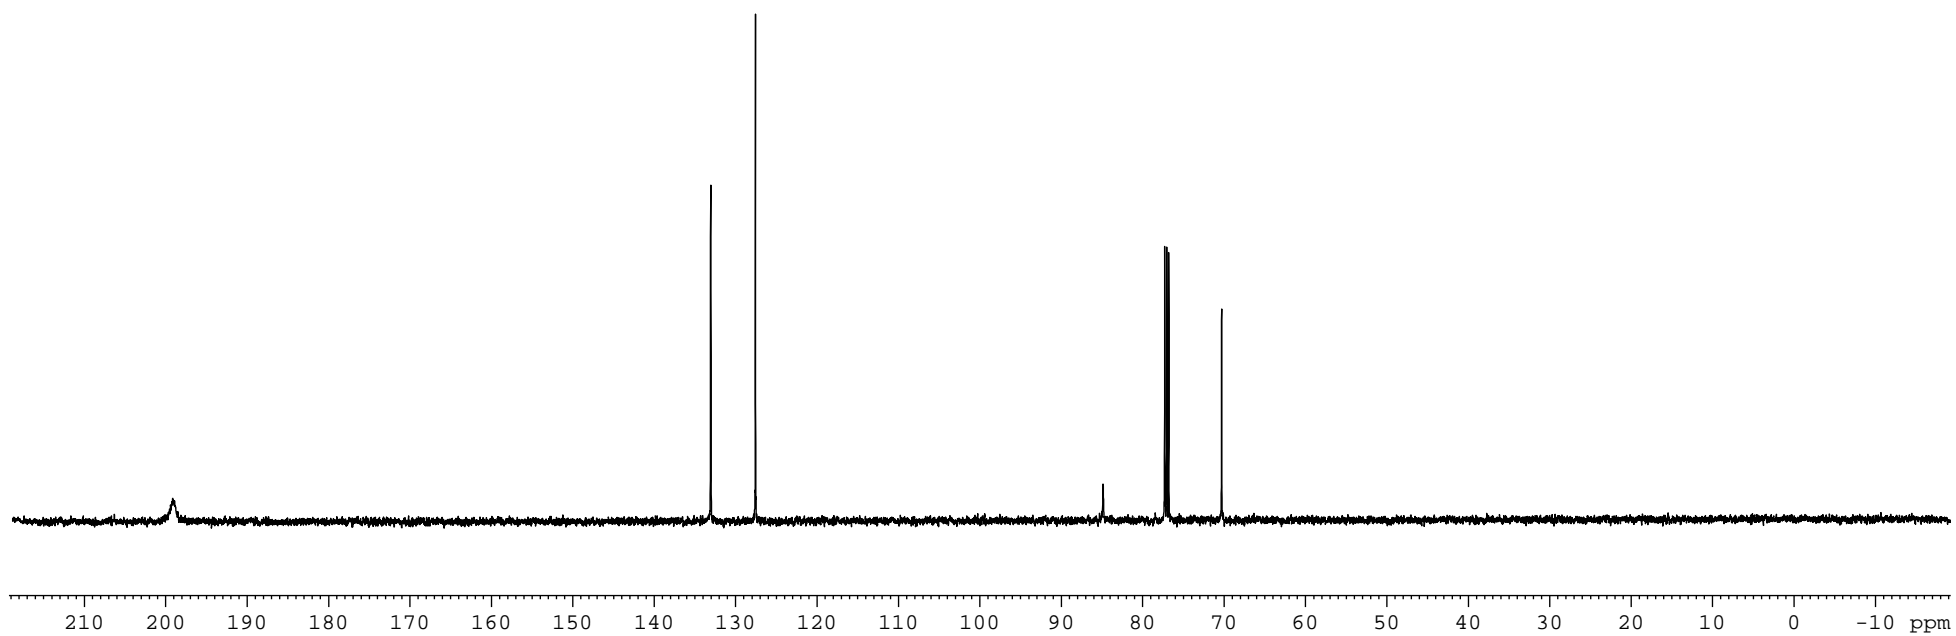

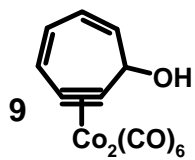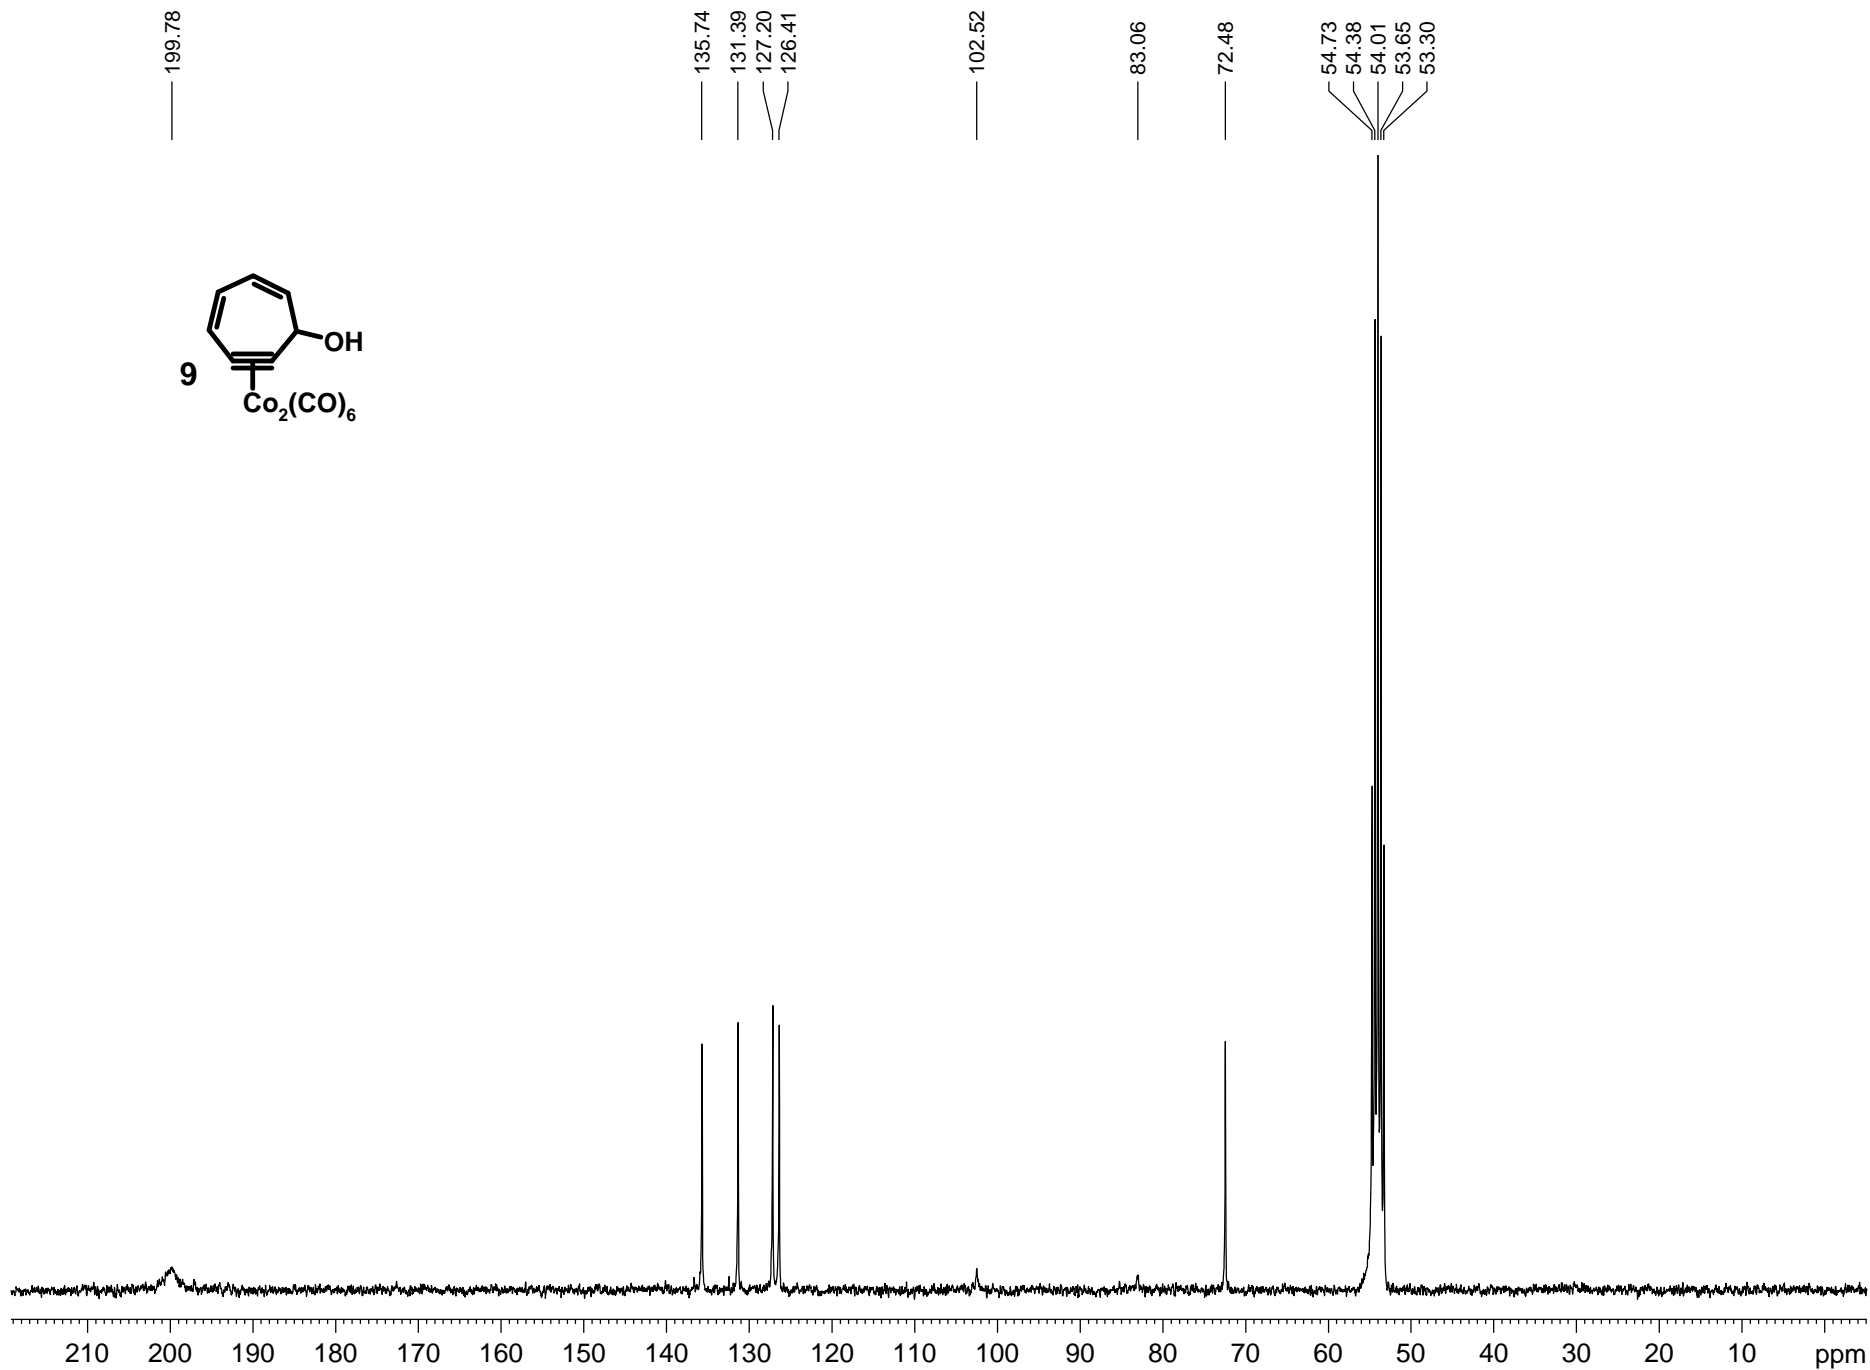

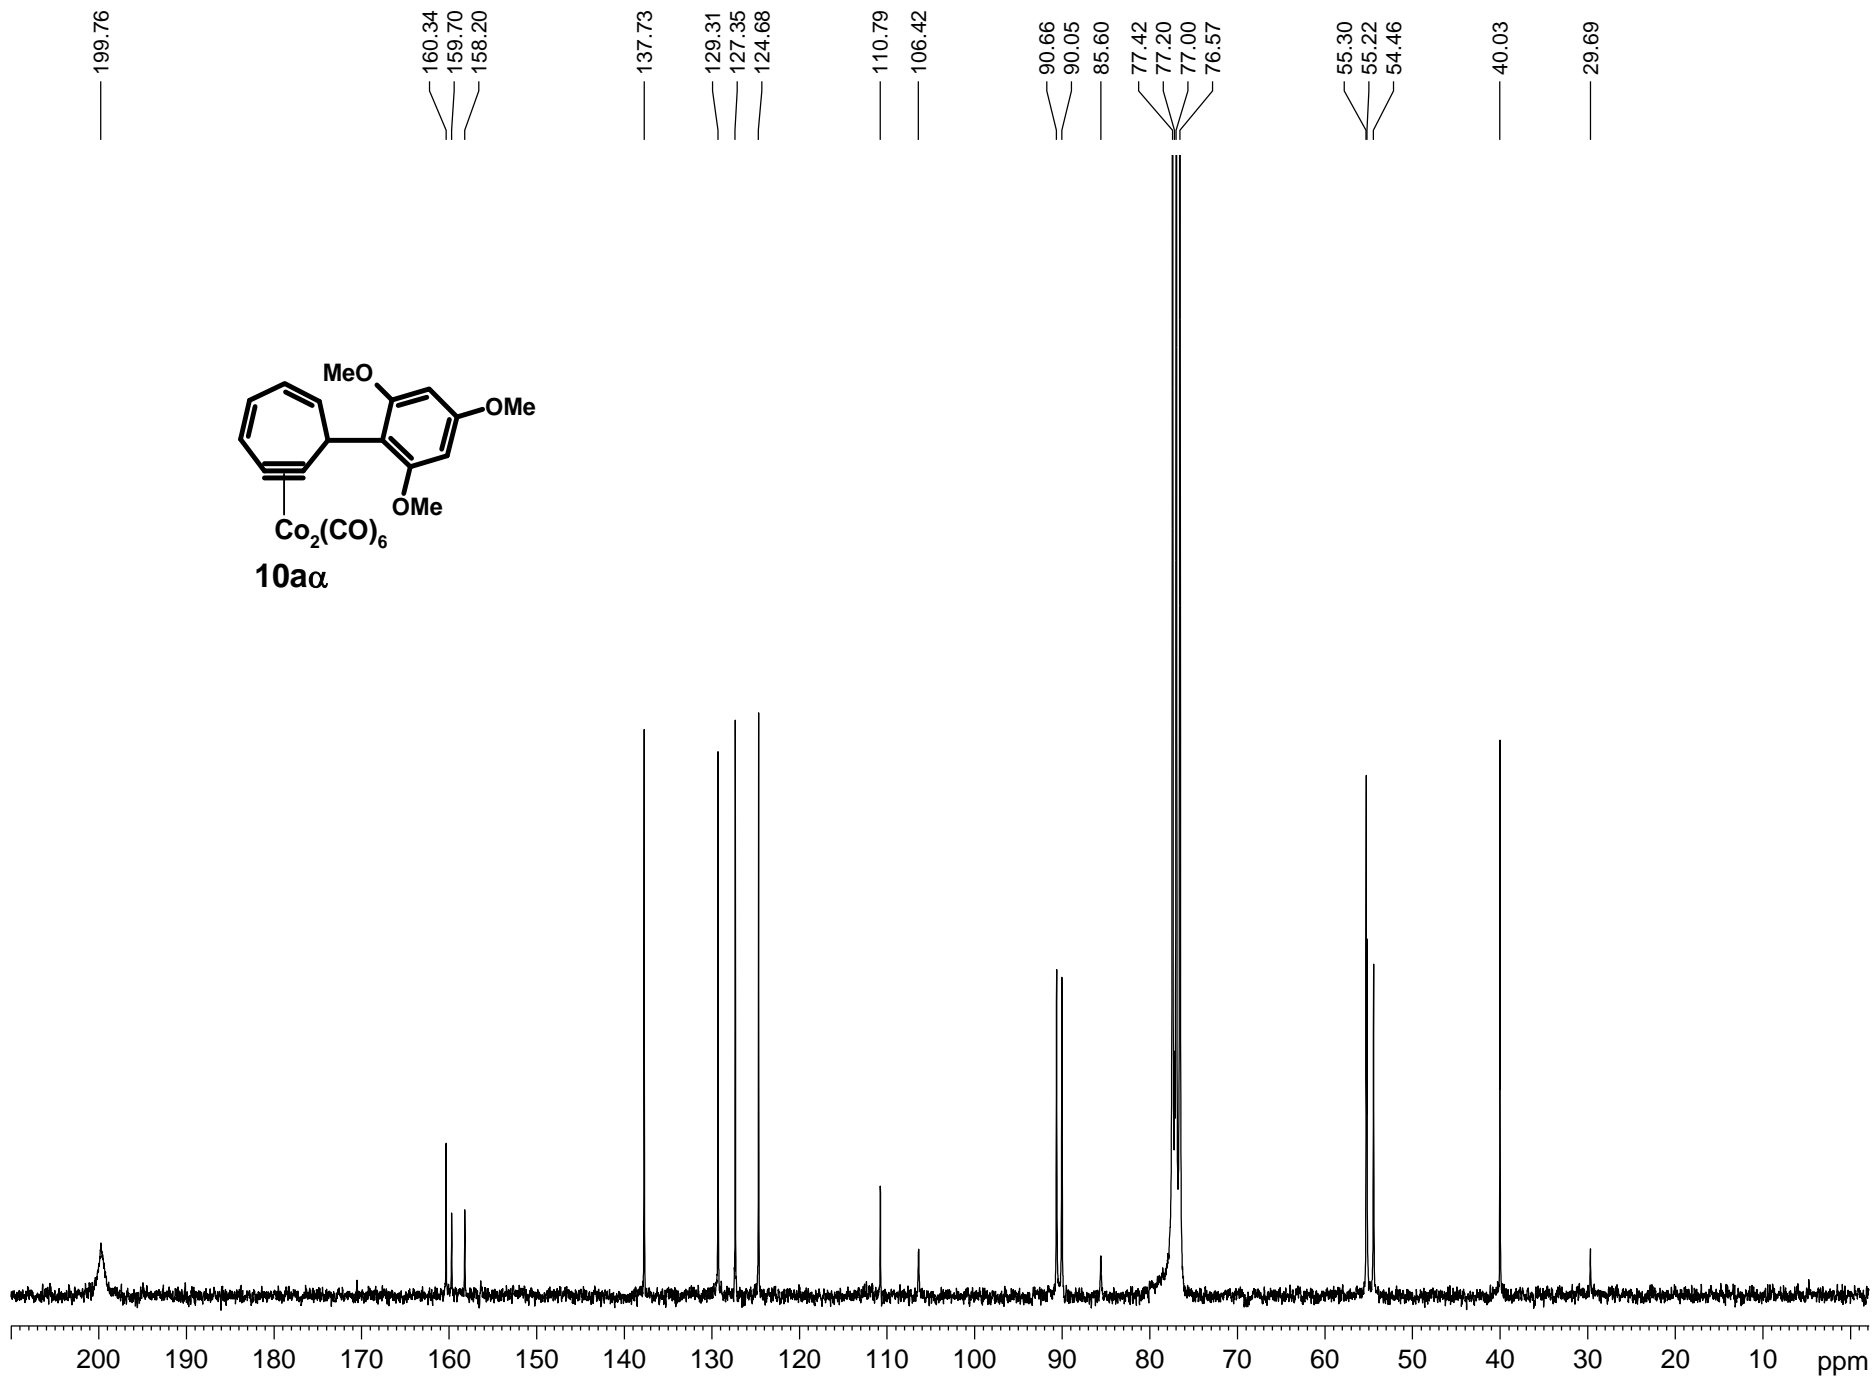

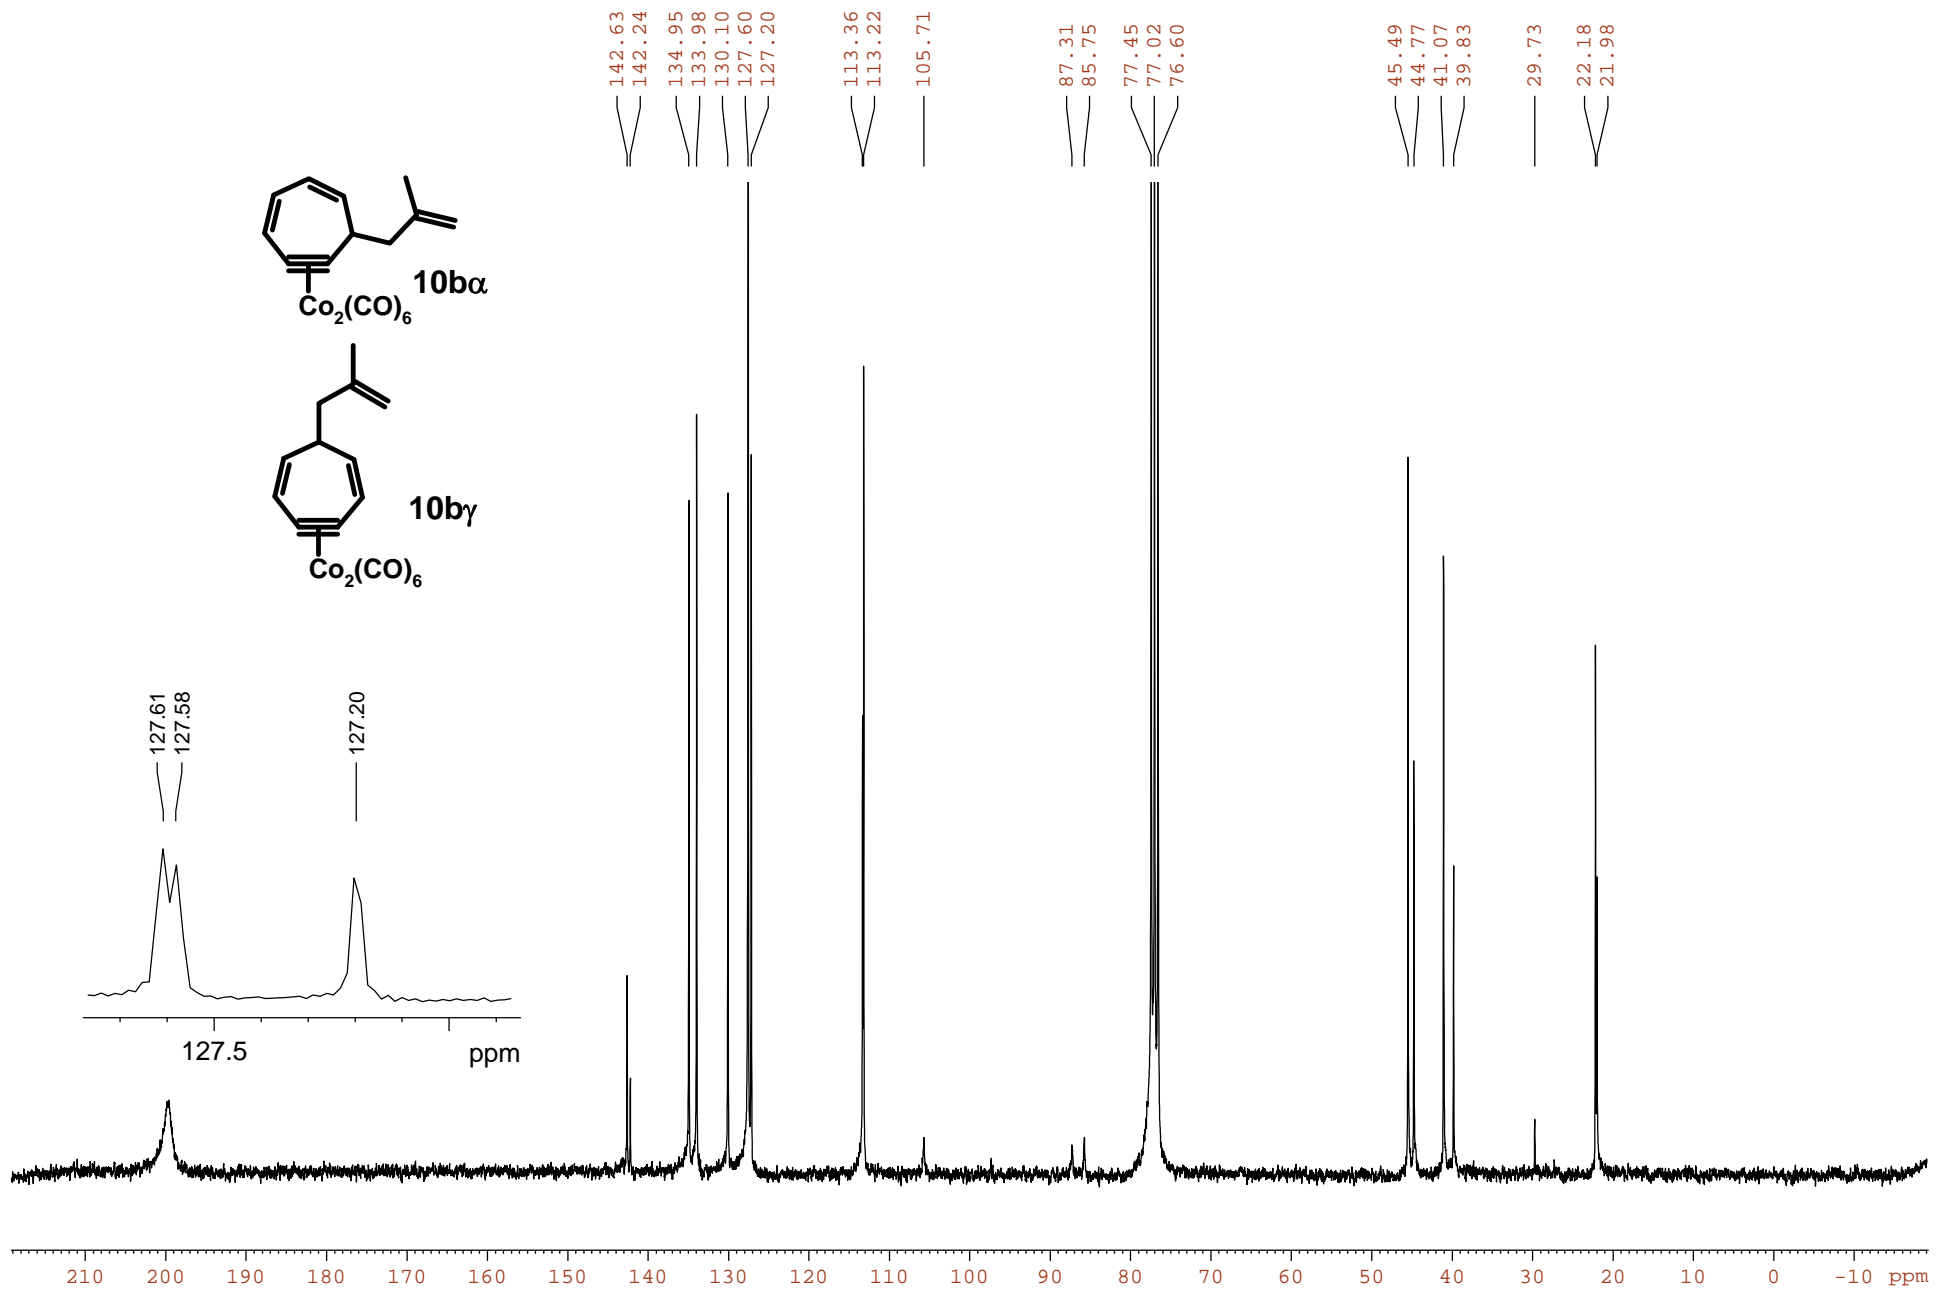

199.56

136.01  
135.49  
135.02  
133.77  
130.19  
127.69  
127.42  
127.12  
117.45

104.90

77.46  
77.04  
76.62

43.47  
42.48  
41.33

29.74

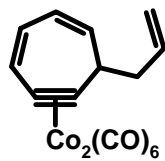

**10c $\alpha$**

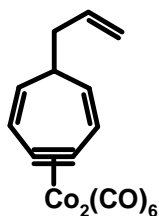

**10c $\gamma$**

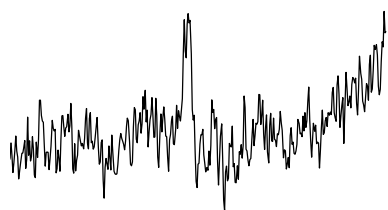

90 88 86 84 82 ppm

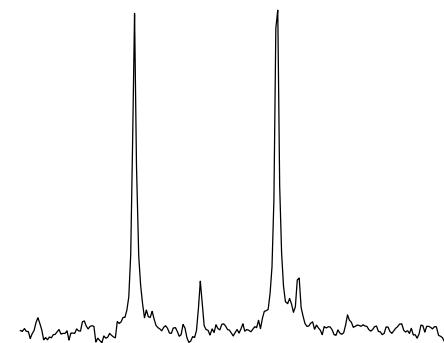

45 44 43 42 41 40 ppm

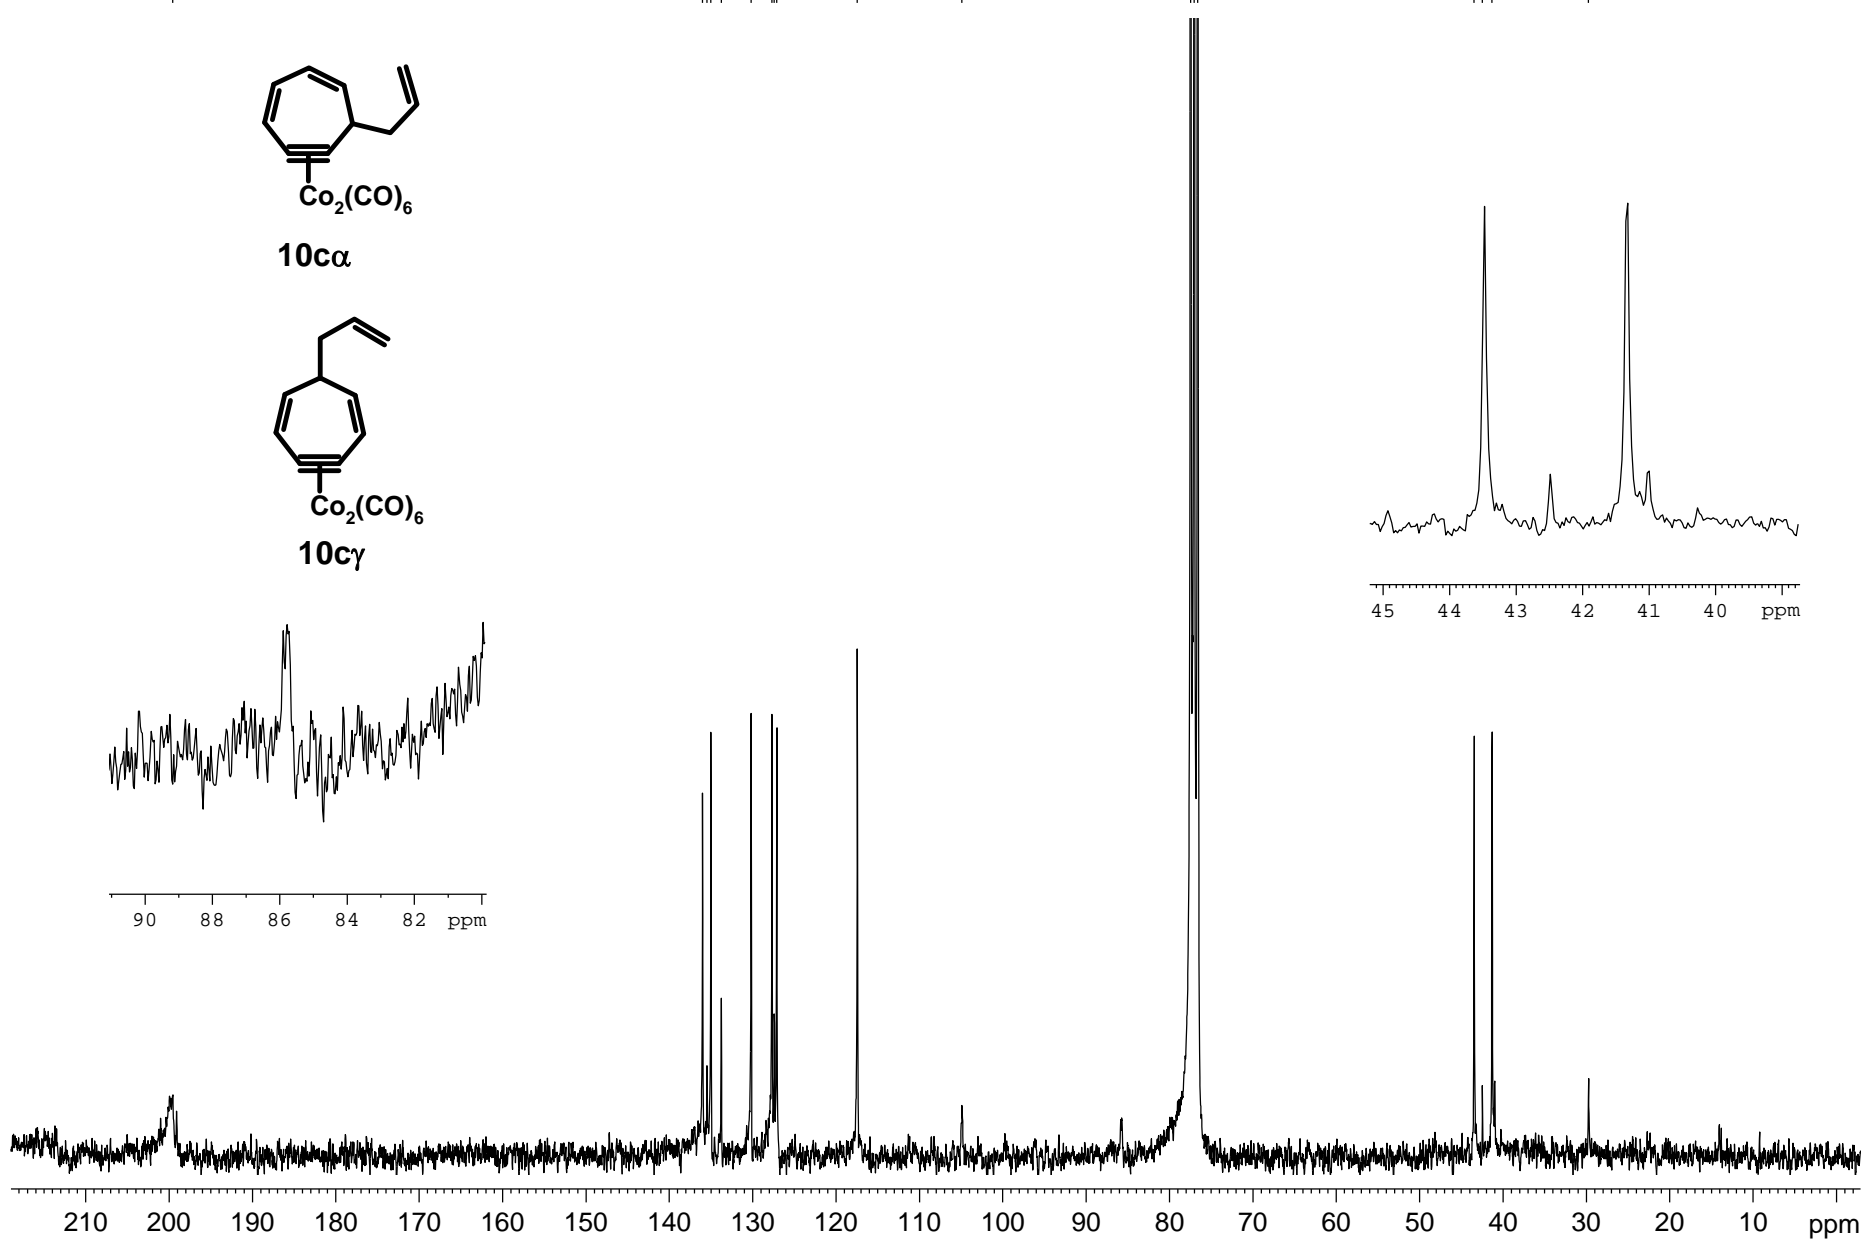

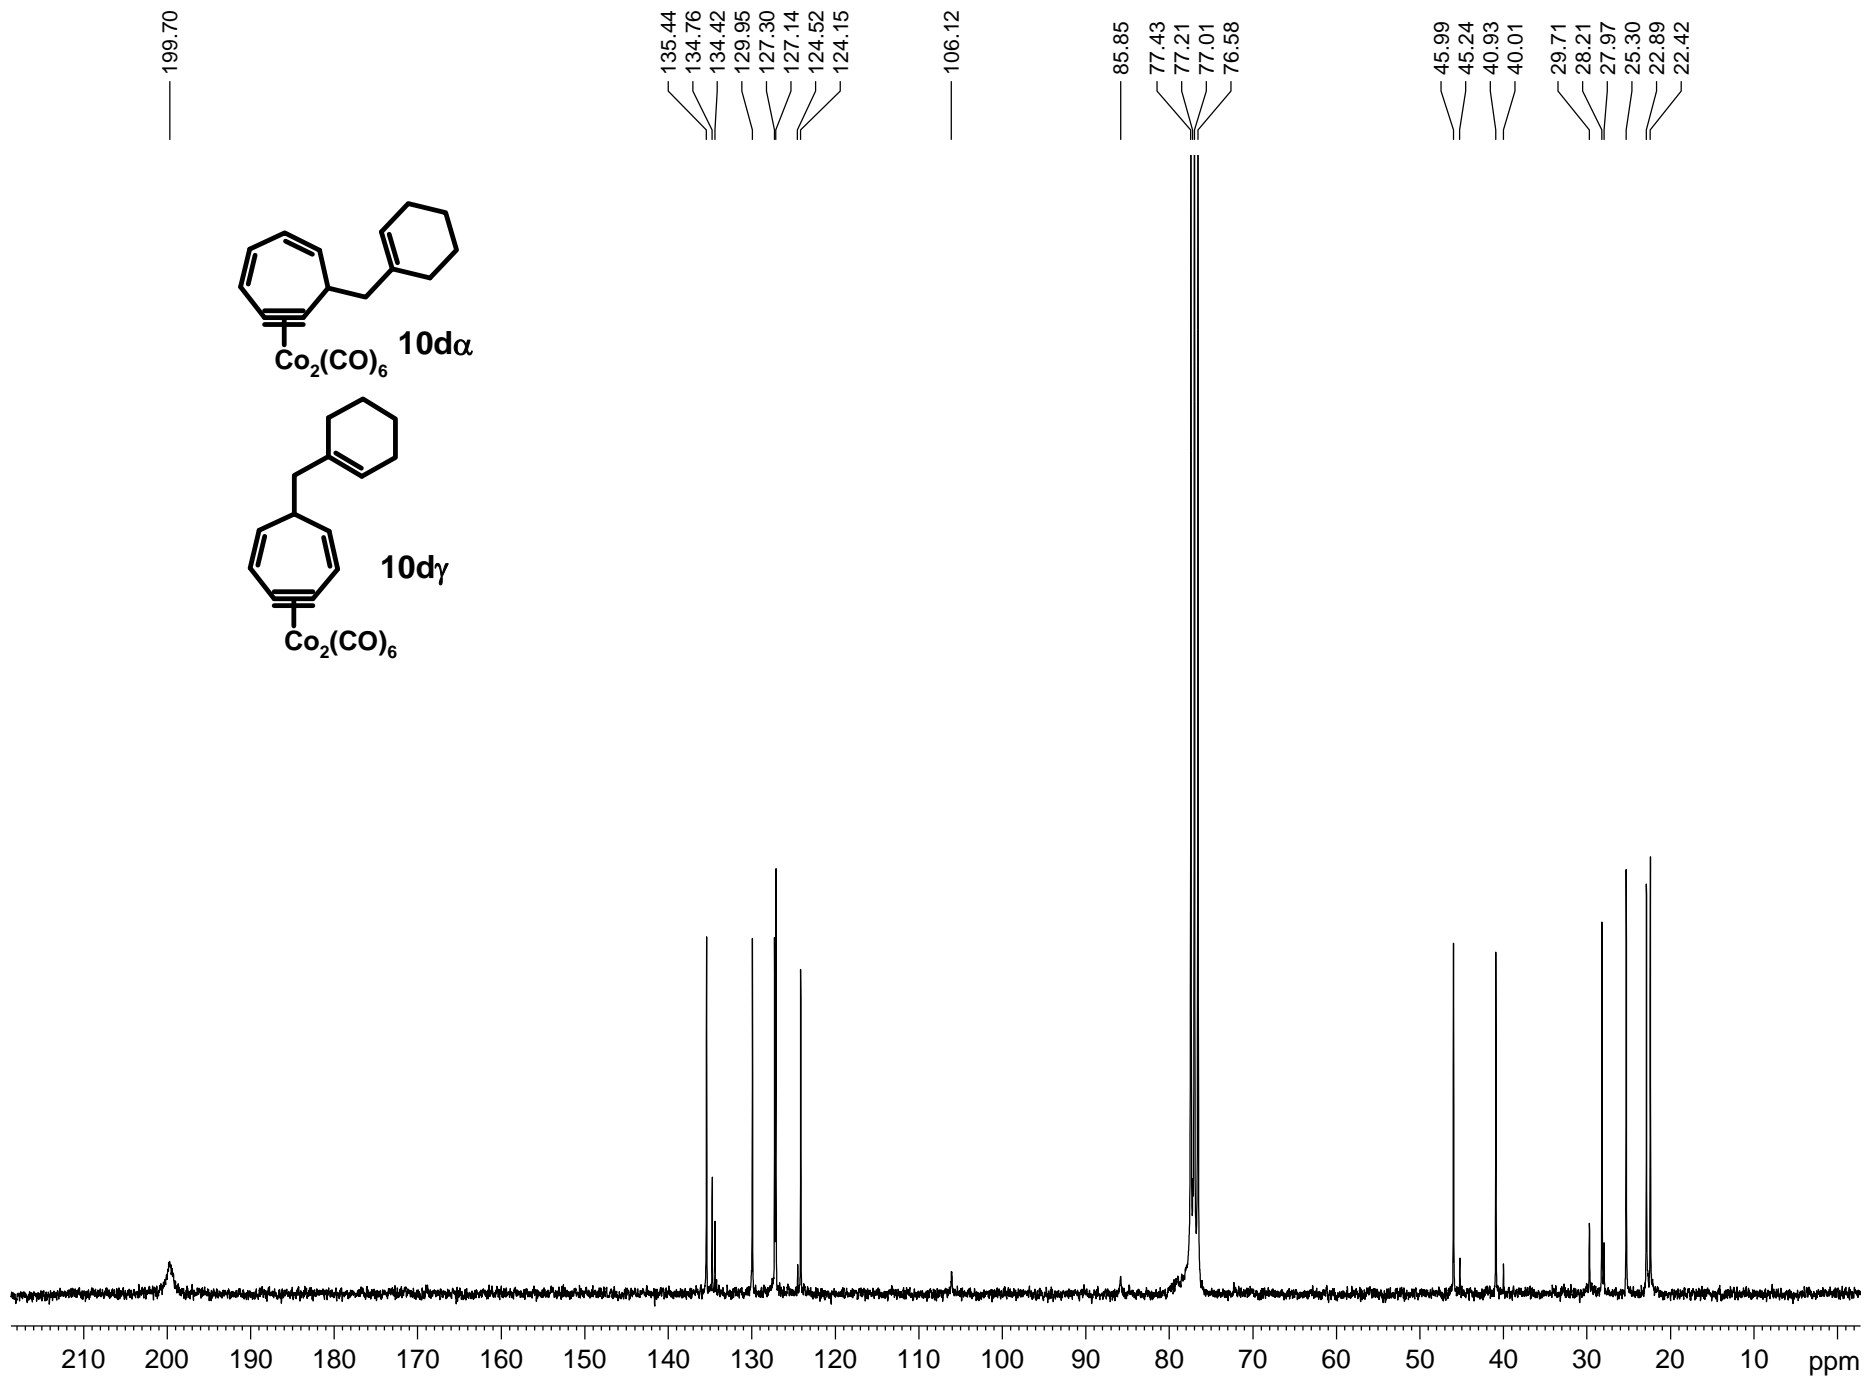

199.01

145.03

138.94

134.30

131.03

127.94

126.57

124.74

124.42

105.91

84.46

77.44

77.02

76.60

45.69

15.36

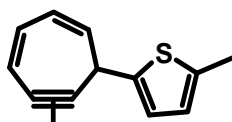

$\text{Co}_2(\text{CO})_6$

**10e $\alpha$**

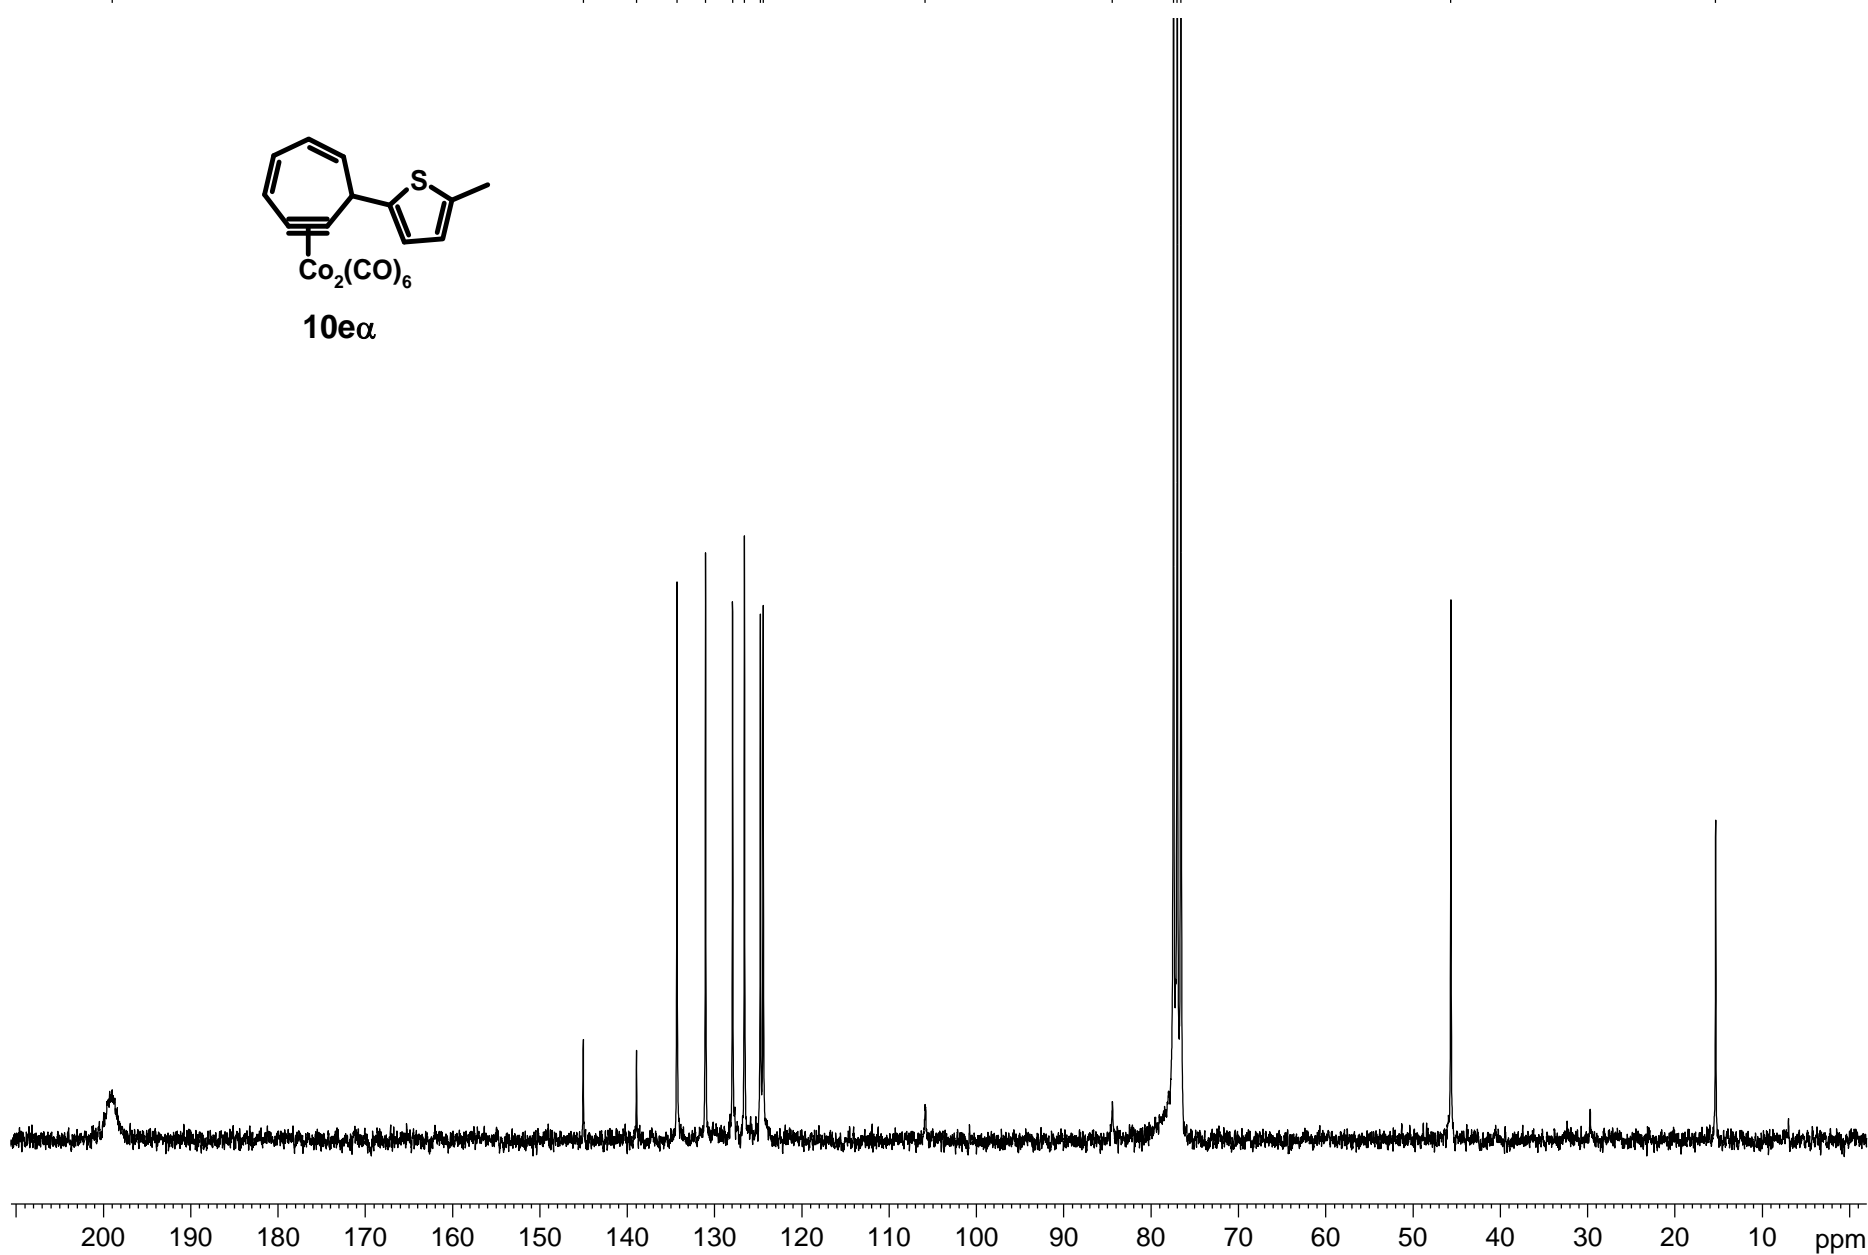



199.17

133.38  
132.78  
132.25  
131.60  
130.78  
130.48  
130.22  
129.83  
129.57  
127.69  
126.91

104.18

77.44  
77.21  
77.02  
76.59

48.48  
46.69

29.72

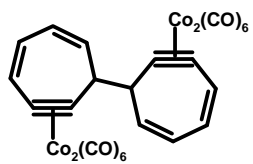

**11 $\alpha$**

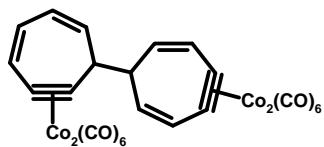

**11 $\gamma$**

Relative signal intensities not reflective of initial isomer ratios due to slow gradual decomposition of **11 $\gamma$**  during acquisition.

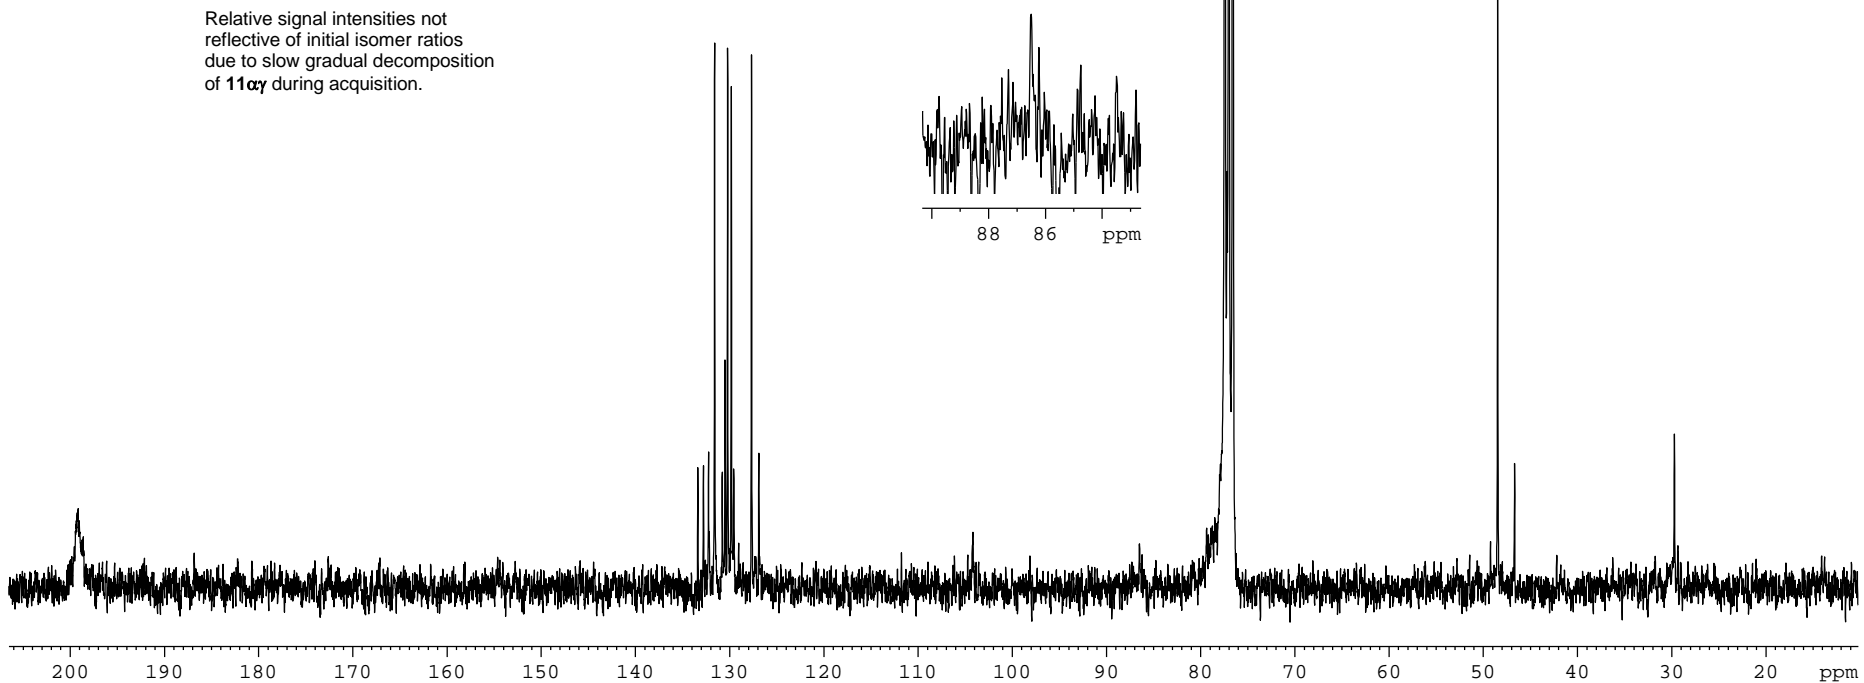

Supplement: b812174e.pdf [file b812174e.pdf]
